# Supplementary material for: Comparison of transcriptional initiation by RNA polymerase II across eukaryotic species
Source: eLife. 2021 Sep 13;10:e67964. doi: 10.7554/eLife.67964 (PMC8463073; doi:10.7554/eLife.67964)
Supplement: Supplementary file 1. [file elife-67964-supp1.xlsx]

## Sheet: Sheet1
S. cerevisiae
TFIIB		SRR8487300
Med7, kin28 -rap		SRR3611461
Med7, kin28 +rap		SRR3611462
Cdk8, kin28 -rap		SRR3611463
Cdk8, kin28 +rap		SRR3611464
Human
TBP (K562)		SRR502378
TBP (K562)		SRR502379
Med1 (MM1S)		SRR617758
Med1 (MM1S)		SRR612159
Pol2 (K562)		SRR6386683
Pol2 (K562)		SRR6386680
Pol2 (K562)		SRR357456
Pol2 (K562)		SRR351655
Pol2 (MM1S)		SRR617760
Pol2 (MM1S)		SRR652480
SP1 (K562)		SRR351827
SP1 (K562)		SRR351828
SP1 (K562)		SRR5112369
NF-YA (K562)		SRR502249
NF-YA (K562)		SRR502251
TFIIB (K562)		SRR502177
TFIIB (K562) Pip-seq		SRR3105722
Med12 (CD34+)		SRR2989151
Cdk8 (MM1S)		SRR1019226
TFIIF (K562)		SRR502390
TFIIF (K562)		SRR502391
E2F1 (MM1S)		SRR3440072
DP1 (MM1S)		SRR3440071
E2F1 (U266)		SRR3440075
DP1 (U266)		SRR3440074
Cdk7 (MM1S)		SRR825492
Cdk7 (MM1S)		SRR825494
Cdk7 (MM1S)		SRR1141242
TBP (hESC)		SRR501987
TBP (hESC)		SRR501988
Pol2 (hESC)		SRR351568
Pol2 (hESC)		SRR351569
Pol2 (hESC)		SRR357495
SP1 (hESC)		SRR351590
SP1 (hESC)		SRR351591
Med1 (hESC)		SRR2056021
Med1 (hESC)		SRR2056022
Med1 (MOLM-14)		SRR1768139
Cdk8 (MOLM-14)		SRR2518115
Cdk8 (MOLM-14)		SRR2518117
Med1 (MCF7)		SRR1542313
Med1 (MCF7)		SRR8482923
Med1 (MCF7)		SRR3102887
Med12 (MCF7)		SRR2318672
Med12 (MCF7)		SRR851928
Med1 (HCT116)		SRR8110818
Med1 (HCT116)		SRR8110819
Pol2 (HCT116)		SRR8110802
Pol2 (HCT116)		SRR8110803
Pol2-S5 (K562)		SRR351715
Pol2-S5 (K562)		SRR351714
Pol2-S2 (K562)		SRR502194
Pol2-S2 (K562)		SRR502195
Taf1 (K562)		SRR351693
Taf1 (K562)		SRR351694
Taf7 (K562)		SRR351649
Taf7 (K562)		SRR351650
Taf1 (hESC)		SRR351727
Taf1 (hESC)		SRR351728
Taf7 (hESC)		SRR351819
Taf7 (hESC)		SRR351820
Med26(HCT116)		SRR9621896
Med26(HCT116)		SRR9621926
Med26 (U20S)		SRR2558759
Mouse
TFIIB (E14)		SRR7262960
TFIIB (E14)		SRR7262961
Med12 (E14)		SRR7262953
Med12 (E14)		SRR7262952
Med1 (E14)		SRR7262948
Med1 (E14)		SRR5309429
Pol II (E14)		SRR7262956
Pol II (E14)		SRR7262957
TBP (V6.5)		SRR057606
TBP (V6.5)		SRR057607
Cdk8 (V6.5)		SRR713346
Cdk8 (V6.5)		SRR1534840
Med12 (V6.5)		SRR058985
Med12 (V6.5)		SRR058986
Med1 (E14tg2a)		SRR9153301
Med1 (E14tg2a)		SRR9153300
Med24 (E14tg2a)		SRR9153304
Med24 (E14tg2a)		SRR9153305
Med1 (V6.5)		SRR058987
Med1 (V6.5)		SRR058988
Med1 (V6.5)		SRR6955443
TBP (B cells)		SRR478468
TBP (B cells)		SRR478469
Med26 (E14)		SRR7262971
Med26 (E14)		SRR7262970
Med26 (B cells)		SRR8066786
Med26 (B cells)		SRR8066785
D melanogaster
TBP (Kc167)		SRR4042463
TBP (Kc167)		SRR4042464
Pol2 (Kc167)		SRR5832213
Pol2 (Kc167)		SRR5832214
Med1 (ML-DmBG3-c2)		SRR7688985
Med1 (ML-DmBG3-c2)		SRR7688986
Med30 (ML-DmBG3-c2)		SRR7688989
Med30 (ML-DmBG3-c2)		SRR7688990
GAGA (S2)		SRR5834719
Taf1 (S2R)		SRR5452843
Taf1 (S2R)		SRR5452844
Taf2 (Kc167)		SRR4042461
Taf2 (Kc167)		SRR4042462
S. pombe
TBP		SRR1105644
TBP-Myc		SRR1541125
Taf7		SRR1105661
