# Supplementary material for: Comparison of transcriptional initiation by RNA polymerase II across eukaryotic species
Source: eLife. 2021 Sep 13;10:e67964. doi: 10.7554/eLife.67964 (PMC8463073; doi:10.7554/eLife.67964)
Supplement: Supplementary file 2. [file elife-67964-supp2.xlsx]

## Sheet: Taf7 K567 downstream
Table of genes where Taf7 and Med26 are categorized as binding "at TSS" or "downstream of TSS"
Note: some of the histone gene names used below are not recognized by some databases, and alternate name versions should be substituted
Taf7 K567 downstream			Taf7 K567 likely downstream			Taf7 K567 at TSS			Med26 HCT116 downstream			Med26 HCT116 likely downstream			Med26 HCT116 at TSS
ABI1			ABCA2			AACS			AACS			AAMP			AAAS
ABHD14B			ABCF1			AAMP			AAGAB			ABHD2			ABCF3
ABT1			ABHD16A			AASDH			AAR2			ABI2			ABHD12
ACADM			ABHD8			AATF			AASDHPPT			ACSL1			ABHD17A
ACCS			ACO2			ABHD12			AATF			ACSL4			ABHD8
ACTB			ACOT9			ABHD13			ABCA2			ACSM3			ABO
ACTL6A			ACSL1			ABHD3			ABCB6			ADAM10			AC012476.1
ADAMTS3			ACSL4			ABI2			ABCB7			ADAMTS3			ACAA2
ADPRHL2			ACSM3			ACAA2			ABCB9			ADGRE2			ACAD10
ADSS			ACTR10			ACAD10			ABCE1			ADIPOR1			ACAD11
AIFM1			ACTR5			ACAP2			ABHD10			ADRM1			ACADM
AKAP8			ACVR2B			ACBD3			ABHD13			AFG3L2			ACBD3
AKIRIN1			ADAM10			ACBD5			ABHD14B			AGER			ACD
AKIRIN2			ADCY10			ACD			ABHD16A			AHCY			ACHE
ALDH9A1			ADGRE2			ACER2			ABHD3			ALDH3B1			ACIN1
ALG1			ADIPOR1			ACIN1			ABI1			ALKBH7			ACSF2
ANKRD36			AEN			ACOT13			ABRAXAS1			ANKLE1			ACYP2
AP2B1			AFG3L2			ACSS2			ABT1			ANKRD39			ADAL
APEX1			AGPAT1			ACTR8			AC118549.1			ANXA2R			ADD1
ARAF			AGPAT3			ACY1			ACAD8			AOC1			ADGRF3
ARHGAP11A			AGPAT5			ADAL			ACADVL			AP2S1			ADNP2
ARMC8			AHI1			ADCY7			ACAP2			APRT			ADSSL1
ASCC3			AK1			ADD2			ACBD6			ARL17B			AFF1
ASF1A			AKIP1			ADD3			ACE			ARL6IP4			AFF4
ASNS			AKR1E2			ADGRF3			ACER3			ARMC8			AGBL3
ATF7			ALDH18A1			ADGRG3			ACLY			ARMH3			AGFG1
ATG10			ALDH3B1			ADGRV1			ACO2			ARRDC4			AGL
ATL2			ALDOA			ADH5			ACOT9			ASPDH			AHNAK
ATP1B3			ALG13			ADRB2			ACOX3			ATL3			AIFM1
ATP5MG			ALMS1			AEBP2			ACSL3			ATOH7			AK9
AURKAIP1			ANGPTL4			AFF1			ACSS2			ATP2A1			AKAP11
B2M			ANKFY1			AFF4			ACTB			ATP6V0D1			AKAP3
BCAT2			ANKRD16			AFMID			ACTL6A			ATP6V0E2			AKR1A1
BCLAF1			ANKRD26			AGER			ACTR10			AVEN			AKR1C2
BDP1			ANLN			AGK			ACTR3B			B3GNT4			AKR1E2
BRD2			ANXA2R			AGO1			ACTR5			B9D1			AKT1S1
BTG1			AP4S1			AGO3			ACTR8			BABAM2			ALDH5A1
BUD31			APOBEC3B			AGPAT2			ACVR1B			BCAP31			ALDOA
C12orf57			APOBEC3D			AGPAT4			ADAMTSL5			BCAR1			ALDOC
C12orf65			APOL4			AHCY			ADCK1			BCL6			ALG9
C15orf61			AQP1			AHCYL1			ADCK2			BCOR			AMD1
C18orf21			AQP11			AHNAK			ADGRB3			BFAR			AMZ2
C1orf53			AQP3			AHSP			ADGRG3			BORCS8			ANAPC1
C3orf38			ARFGAP3			AIF1			ADH5			BRAF			ANAPC13
C5orf51			ARHGEF39			AK3			ADI1			BRAT1			ANAPC15
C6orf47			ARL6IP4			AKAP10			ADORA2B			BRCA1			ANAPC4
C9orf16			ARMC2			AKR1A1			ADPGK			BRD8			ANKRD13A
C9orf78			ARMH3			AKR1C1			ADRB2			BTBD8			ANKRD34A
CANX			ARPP19			AKT1S1			ADSS			BYSL			ANKRD40
CASC3			ARSB			ALAS1			AEBP2			C15orf61			ANO8
CBWD6			ARSK			ALDH5A1			AFDN			C19orf12			ANXA1
CCDC116			ASMTL,			ALG10			AFG1L			C19orf47			AP1G2
CCDC173			ATAD5			ALG10B			AGGF1			C1GALT1C1			AP1M1
CCDC61			ATF3			ALG14			AGO1			C1orf35			AP3S1
CCDC7			ATF6B			ALG5			AGPS			C1orf54			AP5S1
CCDC8			ATOH7			ALKBH1			AGRN			C3			APBB3
CCDC80			ATP11B			AMD1			AGTRAP			C6orf136			APC
CCNB2			ATP2A3			ANAPC10			AHCYL1			C9orf72			APLP1
CCNK			ATP5F1C			ANAPC13			AHI1			CACUL1			APMAP
CCT2			ATP6V0A1			ANAPC16			AHNAK2			CAMKK1			APOBEC3F
CCT5			ATP6V0D1			ANKHD1			AIP			CATSPERG			APOC1
CD69			ATP6V0E1			ANKLE1			AK2			CCDC88B			APOL1
CDC23			ATP6V0E2			ANKRD31			AK4			CCRL2			APPL2
CDC25A			ATP6V1H			ANKRD34A			AKAP10			CCT3			AQP11
CDC27			ATRX			ANKRD42			AKAP12			CD3EAP			ARAF
CDC5L			ATXN10			ANKS6			AKAP8			CD63			ARFGAP1
CDCA2			B9D1			ANKZF1			AKAP8L			CDC123			ARHGAP18
CDK17			BABAM2			ANP32E			AKIP1			CDHR2			ARHGAP4
CDKN1B			BACH2			ANXA1			AKIRIN1			CEBPD			ARHGEF7
CDNF			BAG2			AP1B1			AKIRIN2			CEP290			ARL15
CENPH			BAK1			AP2A2			AKR1C1			CERS4			ARMC10
CEP350			BAZ1B			AP4B1			AKR7A2			CHCHD2			ARMC5
CHAC1			BBX			AP4E1			ALDH18A1			CHKB			ARMC7
CHCHD2			BCL7A			AP5S1			ALDH1B1			CKMT1B			ARPC1A
CHD2			BCOR			APBA2			ALDH4A1			CLASP2			ARPC2
CHD8			BLVRB			APC			ALG10			CLSTN3			ART5
CKAP2			BOLA3			APMAP			ALG10B			CMTM6			ASB8
CLHC1			BORCS8			APOM			ALG11			CNDP2			ASCC1
COA6			BRAT1			AQP10			ALG12			CNIH4			ASCC3
COIL			BRCA1			ARCN1			ALG13			CNOT2			ASH2L
COP1			BRD8			ARFGAP2			ALG14			COA4			ATAD3B
COPA			BRMS1			ARGLU1			ALG2			COA6			ATF6B
COPB2			BROX			ARHGAP18			ALG5			COLGALT1			ATF7IP2
COPE			BTBD1			ARHGAP19			ALG8			COMMD7			ATG13
COPZ1			BTBD8			ARHGAP4			ALMS1			CORO1B			ATG14
COX14			BTF3L4			ARHGEF7			ALOX5			COX6B1			ATG2B
COX6A1			BTG3			ARL15			AMACR			CPOX			ATG9A
COX6B1			BTN3A1			ARMC1			AMMECR1			CPSF7			ATOX1
COX7C			C12orf29			ARMC5			AMPD3			CRTC2			ATP2B4
COX8A			C14orf178			ARMC7			ANAPC11			CRY1			ATP5MG
CREBZF			C16orf46			ARMCX5			ANGEL1			CSTF1			ATP5PB
CSKMT			C19orf66			ARMT1			ANGEL2			CTDSP1			ATP6V0E1
CSTF1			C1orf116			ARPC5			ANGPTL4			CTDSPL2			ATP6V1E1
CWC22			C1orf123			ARRDC3			ANKFY1			CUEDC2			ATP6V1H
CYB5D2			C1orf167			ARV1			ANKHD1			CUL1			ATXN2
CYTH2			C1orf56			ASAH1			ANKHD1-EIF4EBP3			CYB561			ATXN7L1
DAB2			C1RL			ASAH2B			ANKRD16			DCAF12			AUNIP
DAP3			C2orf42			ASCC1			ANKRD26			DCAF4			AZIN2
DBF4			C2orf49			ASH2L			ANKRD27			DCLRE1B			B3GLCT
DCUN1D5			C3orf18			ASIC4			ANKRD31			DDOST			B3GNT8
DCXR			C5orf15			ASPH			ANKRD46			DDR1			B4GALT3
DDI2			C6orf132			ASPM			ANLN			DEF8			B9D2
DDIT4			C7orf25			ATAD2			ANP32B			DENND5B			BAIAP2
DDX39A			C8orf44			ATE1			ANP32E			DEUP1			BBC3
DDX59			C9orf116			ATF5			ANXA11			DGKA			BCDIN3D
DEGS1			CAAP1			ATF6			ANXA5			DHRS12			BCL2L2-PABPN1
DHRS7B			CALML6			ATF7IP2			AP1B1			DHX33			BDH2
DHX15			CAMK1			ATG14			AP1S1			DIMT1			BDP1
DLD			CAMKK2			ATG2A			AP2A2			DIRC2			BEND6
DMTF1			CAND2			ATG4A			AP2M1			DNAAF2			BEX4
DNA2			CASP3			ATG4C			AP3B1			DNAH3			BICRA
DNAJA1			CASP8			ATG9A			AP3M2			DNAJB14			BIRC2
DNMT3B			CASP9			ATL3			AP4S1			DNAJC14			BIRC6
DNTTIP2			CAST			ATN1			AP5B1			DNAJC4			BLZF1
DUSP5			CBR4			ATOX1			APBB1			DSC2			BMI1
E4F1			CCAR1			ATP13A1			APH1A			DUS3L			BMS1
ECI2			CCDC117			ATP23			API5			DYM			BOLA2
ECT2			CCDC138			ATP5F1B			APLF			EEF1AKMT1			BOLA2B
EDEM3			CCDC15			ATP5MF			APOBEC3B			EIF2B4			BRAP
EED			CCDC152			ATP5PD			APOE			EIF2S1			BRD9
EEF1A1			CCDC194			ATP5PF			APOL2			EIF2S2			BRICD5
EEF1E1			CCDC28A			ATP6V1D			APOL4			ELAC2			BRPF3
EFTUD2			CCDC71			ATPAF1			APOM			ELF3			BTBD2
EGLN3			CCDC77			ATR			APOOL			EMD			BTN3A3
EGR1			CCDC88B			ATRIP			APPBP2			EML3			BUB1
EIF1			CCDC91			ATXN7L1			AQP1			ENOPH1			C11orf54
EIF2B4			CCDC93			ATXN7L3B			AQP3			ESCO1			C11orf58
EIF4A1			CCRL2			AUNIP			AQR			ESRRA			C12orf60
EIF4H			CCT3			AXDND1			AREL1			ETFDH			C14orf119
ELOC			CD151			AZI2			ARF4			EVI5			C16orf46
EMC3			CD2AP			AZIN1			ARF5			FAHD1			C17orf75
EMC4			CD320			B3GALT4			ARFGAP3			FAM104A			C1orf100
EPC1			CD53			B4GALT4			ARFGEF1			FAM155A			C1orf122
EPM2A			CD63			B9D2			ARFIP1			FAM160B2			C1orf131
EREG			CD82			BABAM1			ARGLU1			FAM216A			C22orf23
ERN1			CD99L2			BAG3			ARHGAP17			FAM234A			C2orf49
ESCO1			CDC123			BAG4			ARHGEF18			FAM69B			C2orf68
EWSR1			CDC42EP1			BAMBI			ARHGEF39			FAM83H			C3orf18
EXO1			CDC42EP4			BBS1			ARIH2			FCN3			C3orf58
EXOSC3			CDCP1			BBS2			ARL14EP			FLII			C5orf34
EXOSC9			CDK2AP1			BBS7			ARL2			FRG2C			C6orf223
FAM149B1			CDK9			BCCIP			ARL5A			GABARAP			C6orf89
FAM32A			CDKN1C			BEX4			ARL8B			GABBR1			C7orf25
FAM72D			CEBPB			BFAR			ARMC1			GABPB2			C8orf82
FASN			CEP152			BICRA			ARMC2			GAD1			C9orf66
FBXO5			CEP70			BICRAL			ARMC6			GATAD2A			CA13
FBXO8			CEP72			BLOC1S1			ARPC3			GEMIN8			CAB39
FEZ1			CERS2			BLZF1			ARPC5			GLIS2			CACFD1
FIZ1			CHIC1			BMI1			ARPP19			GLUD2			CACNB1
FTH1			CHID1			BMS1			ARRDC1			GNG10			CACYBP
FTSJ3			CHUK			BOLA2			ARSB			GP6			CAGE1
FUBP1			CIDEC			BORA			ARV1			GPD1L			CAPN10
GABPB1			CILP2			BORCS5			ASAH1			GPR85			CASD1
GADD45B			CKMT1A			BPGM			ASB1			GSR			CASP10
GADD45GIP1			CKMT1B			BPNT1			ASB13			GTPBP6,			CASTOR3
GART			CLASP2			BRCA2			ASB3			GTPBP6,_r1			CATSPER1
GCH1			CLCF1			BRICD5			ASB6			GVQW2			CATSPER4
GMCL1			CLCN2			BRK1			ASL			H3F3C			CBWD2
GNG5			CLDND1			BRWD1			ASMTL,			HDAC8			CBWD3
GOLGA1			CLIC2			BSG			ASMTL,_r1			HDC			CBWD5
GOPC			CMC4			BTBD2			ASNSD1			HERC3			CCDC116
GOSR1			CMTM3			BTG2			ASPM			HEYL			CCDC121
GPBP1			CMTM6			BTN1A1			ASRGL1			HGSNAT			CCDC142
GPN3			CMTR2			BUB1			ASTE1			HINT3			CCDC150
GTF2A1			CNPPD1			BUB1B			ASXL2			HIST1H1T			CCDC157
GTF2H5			COG7			BZW2			ATAD2			HIST1H3C			CCDC173
GTF3C6			COL1A1			C12orf60			ATAD5			HMGN3			CCDC189
GTPBP4			COLGALT1			C14orf119			ATAT1			HNRNPA3			CCDC57
GUF1			COLGALT2			C15orf40			ATF6			HOXB7			CCDC58
H2AFZ			COMMD7			C16orf71			ATF7			HOXB9			CCDC6
HBA1			COQ10A			C17orf53			ATG10			HYAL2			CCDC74B
HBA2			CORO6			C17orf75			ATG101			ID2			CCDC8
HBE1			CPA1			C18orf32			ATG16L1			IDH3G			CCDC85B
HBG1			CPLANE2			C19orf47			ATG5			IFT122			CCDC87
HBG2			CPSF7			C19orf57			ATG7			IFT57			CCDC9
HCFC1			CR2			C19orf81			ATIC			IGSF8			CCDC91
HDLBP			CRISPLD2			C1orf131			ATP1B3			IKBIP			CCT6B
HECTD4			CRK			C1orf198			ATP23			IL12RB1			CD24
HES1			CRY1			C1orf43			ATP5F1B			IL15RA			CD33
HMGB2			CRYBG2			C1orf74			ATP5F1D			IL18RAP			CD3D
HPS5			CRYL1			C20orf96			ATP5F1E			INHA			CD81
HSD17B11			CSAG1			C21orf91			ATP5MC2			INO80			CDC16
HSPA4			CSNK1D			C3orf33			ATP5ME			IQCB1			CDC25C
HSPA5			CSRP1			C4orf33			ATP5PD			IRF5			CDC37L1
HSPA9			CSTF2			C5orf34			ATP5PO			ITFG1			CDCA5
HSPH1			CSTF2T			C6orf120			ATP6AP2			JADE2			CDK5R1
ICE2			CT55			C6orf223			ATP6V0A1			KCTD13			CDKN2AIPNL
ID1			CTHRC1			C6orf48			ATP6V0A2			KDM2B			CDNF
INSIG1			CTU1			C8orf59			ATP6V0B			KDM6B			CDPF1
INTS4			CUEDC1			C8orf76			ATP6V0C			KHNYN			CEBPZ
INTS5			CYB561			C9orf40			ATP6V1B2			KIF21B			CEMIP2
INTS6			CYFIP1			C9orf64			ATP6V1E2			KISS1R			CENPB
INTS7			CYP2R1			CABLES2			ATP9B			KNL1			CENPBD1
IQCB1			DAG1			CACNA1F			ATPAF1			KYAT3			CENPE
IQCH			DAPK1			CACYBP			ATR			LAMB4			CENPK
ISOC2			DAPK3			CAD			ATRIP			LAMTOR1			CENPM
JUN			DCBLD1			CAGE1			ATRX			LAX1			CENPP
JUND			DCDC2B			CALM1			ATXN10			LIG1			CENPT
KATNBL1			DCLRE1B			CANT1			ATXN1L			LIG3			CENPX
KCTD7			DCTD			CAPRIN1			ATXN7_r1			LIN52			CEP135
KIAA1191			DCTN2			CAPZA1			ATXN7L3B			LONRF3			CEP70
KLHL18			DDOST			CARD6			AUH			LRP10			CEP85L
KPNA2			DDR1			CARD9			AURKAIP1			LRRC23			CEPT1
LDHB			DFFA			CASC1			AVPI1			LSG1			CFAP57
LENG8			DHRS1			CASP10			AZI2			LSM12			CFB
LLPH			DHRS12			CATSPERG			B2M			LYSMD2			CFLAR
LRIG2			DHX33			CAVIN1			B3GALT4			MAN2A1			CHCHD10
LSM10			DHX37			CBSL			B3GNT2			MAP2K1			CHML
LSM2			DIAPH3			CBX4			B4GALNT1			MAU2			CHMP2A
LUC7L			DIS3			CBX8			B4GALT4			MBD3			CHMP3
LUC7L3			DLG1			CC2D1A			B4GALT7			MBNL1			CHMP6
M6PR			DMWD			CCDC106			BABAM1			MCIDAS			CHPT1
MACROD1			DNAJC10			CCDC12			BACH2			MCM5			CHRAC1
MAT2A			DNAJC22			CCDC121			BAG1			MDK			CHSY1
MCM3AP			DNAJC9			CCDC124			BAG2			MIF			CHTF8
MCM7			DNAL4			CCDC142			BAG4			MLKL			CHUK
MDM4			DNALI1			CCDC169			BAG5			MOAP1			CHURC1-FNTB
MED24			DNMT1			CCDC28B			BAHD1			MRPS7			CIAPIN1
METTL16			DTNBP1			CCDC43			BAIAP2L1			MSL3			CIP2A
METTL9			DUS3L			CCDC58			BAK1			MUS81			CISD2
MICU2			DUSP19			CCDC59			BANF1			MUTYH			CKB
MID1IP1			DUSP22			CCDC6			BAZ1A			MXI1			CKLF
MIOS			DYM			CCDC66			BAZ1B			MYCL			CKLF-CMTM1
MKS1			DYNC2LI1			CCDC85B			BBS10			N4BP3			CLCN7
MRPL15			E2F1			CCDC97			BBS2			NAV1			CLDN12
MRPL16			ECHDC3			CCND2			BBX			NCBP1			CLEC18B
MRPL21			ECPAS			CCNG2			BCAS3			NCLN			CLHC1
MRPL45			EFCAB11			CCP110			BCAT2			NDUFS7			CLN3
MRPL47			EID2B			CCPG1			BCCIP			NEDD4L			CLNS1A
MRPL49			EIF3L			CD24			BCL10			NEDD8			CLOCK
MRPL54			EIF4EBP3			CD2BP2			BCL2L13			NFYA			CLSTN1
MRPS15			EIF4G1			CDC25C			BCL7A			NIPSNAP3A			CMC4
MRPS16			ELF3			CDC34			BCL7B			NLRX1			CMPK1
MRPS18C			ELL3			CDC37			BCL7C			NOL4L			CNNM3
MRPS24			ELOVL3			CDC42			BCL9L			NR2C1			CNOT8
MRPS35			EML3			CDC6			BCLAF1			NR2C2			CNR2
MRPS36			ENDOG			CDCA4			BCS1L			NRBP1			CNTD1
MSH5			ERCC6			CDCA7			BET1			NTAN1			CNTROB
MTF1			ERICH1			CDIPT			BET1L			NUDT13			COA3
MTF2			ERLIN2			CDK4			BEX2			NVL			COA7
MTFR1			ERRFI1			CDK5R1			BICRAL			OSGEP			COMMD3
MTIF3			ESYT2			CDK5RAP1			BIRC5			OTX1			COMMD5
MTR			ETHE1			CDKAL1			BLOC1S1			OXSM			COMT
MTRNR2L4			EXPH5			CDR2L			BLOC1S2			PA2G4			COPG1
MVD			EZH1			CEBPZ			BLOC1S4			PACRG			COPG2
MYL12B			F11R			CEBPZOS			BLVRA			PAK1			COPS6
NAMPT			F2RL3			CENPC			BLVRB			PAN2			COPS8
NASP			FAM111A			CENPE			BNIP1			PANO1			COQ10A
NBEAL2			FAM120B			CENPO			BNIP3			PARP12			COQ5
NCAPH2			FAM122C			CENPQ			BOD1			PCGF5			COX10
NCBP3			FAM13B			CEP104			BOLA3			PCSK9			COX16
NCDN			FAM171A2			CEP120			BORCS5			PDAP1			CPLANE2
NCOA4			FAM184A			CEP128			BORCS8-MEF2B			PDCL3			CPNE2
NDUFA1			FAM222B			CEP295			BRCC3			PDGFA			CPNE5
NDUFB3			FAM234B			CEP76			BRD2			PFN1			CPTP
NFKBIA			FAM69B			CEP83			BRD7			PHLDB1			CR1L
NFU1			FAM84A			CEP85L			BRF2			PHLDB3			CRACR2B
NGLY1			FAM86C1			CEPT1			BRIP1			PIK3CG			CREBL2
NMU			FANCE			CERS6			BRIX1			PLD1			CRYL1
NOA1			FANCF			CFAP298			BRK1			PLEKHJ1			CRYZ
NOLC1			FANCL			CFAP57			BROX			POLR2H			CSAG1
NRDC			FBL			CFLAR			BRWD1			POLR3B			CSF1
NSRP1			FBXL12			CGRRF1			BSCL2			PPM1J			CSKMT
NUSAP1			FCGR3B			CHAMP1			BTAF1			PPM1K			CSNK1D
OFD1			FCN3			CHCHD10			BTBD1			PPP1R27			CSPP1
ORC5			FCRLB			CHCHD5			BTF3			PPP1R37			CTCFL
OTUD3			FDFT1			CHKB			BTF3L4			PPP1R3E			CTHRC1
PAGR1			FER			CHM			BTG3			PPP5C			CTIF
PANK4			FGR			CHMP2A			BTN1A1			PPT2			CTNNA1
PAPOLA			FHIT			CHMP6			BTN2A1			PRELID3B			CTPS2
PARPBP			FLNA			CHTF8			BTN2A2			PRKAR1B			CTSD
PCMT1			FNBP1L			CHURC1			BTN3A1			PRMT3			CUL2
PCYT1A			FNDC3B			CIAPIN1			BTN3A2			PRMT5			CUL9
PDCD6IP			FPGT			CKS2			BUB1B			PRPF8			CWC25
PDIA3			FPGT-TNNI3K			CLDN12			BUB3			PRR14			CXCL2
PEX12			FRAT1			CLDN23			BUD13			PRSS21			CXorf40A
PEX6			FSD1L			CLINT1			C10orf88			PSEN2			CXorf58
PFDN5			FUCA1			CLK1			C11orf49			PSMC4			CYB561D2
PIM1			FUNDC1			CLNS1A			C11orf71			PSMD13			CYB5D2
PKM			FURIN			CLSPN			C11orf98			PSMG1			CYB5R3
PKN2			FZD4			CNIH4			C12orf29			PSMG3			CYBA
PLK4			GABARAPL2			CNKSR3			C12orf49			PSMG4			CYBRD1
PMF1			GABPB2			CNNM2			C12orf65			PTGS1			CYFIP1
PMF1-BGLAP			GAD1			CNOT4			C12orf66			PTPA			CYP3A5
PNP			GAGE1			CNOT7			C14orf178			PUM3			CYSTM1
PNPT1			GAGE2A			COA4			C15orf40			QDPR			DAB2
PNRC1			GAL			COA5			C16orf58			RAB11B			DAZAP2
POC5			GALNT12			COA7			C16orf72			RAB36			DBI
PPAT			GALNT6			COG2			C16orf87			RAB43			DCLRE1A
PPDPF			GATAD2A			COL6A5			C16orf91			RAB8A			DCPS
PPIB			GBA2			COMMD1			C18orf21			RAB8B			DCTN4
PPIG			GDF5			COMMD3			C18orf25			RALGDS			DCTN6
PPM1B			GEMIN2			COMMD9			C18orf32			RAP2C			DDAH2
PPP1R15A			GEMIN8			COPG1			C19orf44			RBCK1			DDHD2
PPP4R3A			GFOD1			COPS2			C19orf48			RBMXL1			DDX1
PPWD1			GHDC			COPS3			C19orf53			RDH14			DDX11
PRAME			GIN1			COPS5			C19orf66			RECQL4			DDX19B
PRDX6			GIPR			COPS7A			C19orf70			RIMBP3			DDX20
PRKAR2B			GLO1			COPS8			C19orf73			RIMKLB			DDX6
PRPF38A			GLUD1			COQ9			C1orf112			RIT1			DEDD
PRPF38B			GNS			CORO1A			C1orf116			RNASE4			DENND4C
PRPF4B			GOLGB1			CORO1C			C1orf123			RNF103-CHMP3			DENND6A
PRR3			GOSR2			COTL1			C1orf216			RNF125			DGAT2
PSMB2			GPC6			COX10			C1orf43			RNF4			DGCR6
PSMB4			GPD1L			COX18			C1orf52			ROM1			DGCR6L
PSMD12			GPR108			COX4I1			C1orf74			RRP9			DHRS1
PSMD3			GPRIN1			CPEB3			C1QBP			RSC1A1			DHRS11
PSMG4			GPSM2			CPEB4			C1RL			RSL24D1			DHX16
PSPH			GRAMD1A			CPNE3			C20orf194			RTN4RL2			DHX57
PTAR1			GTF2E2			CPNE7			C2orf42			SAFB2			DIRAS3
PTCD2			H3F3C			CPPED1			C2orf69			SCAP			DIS3L
PTPN4			HCFC1R1			CPQ			C2orf76			SH2B2			DISP3
PUM1			HEATR1			CPSF1			C3orf33			SH3BGR			DLAT
PWP1			HERC3			CPSF2			C5AR1			SH3BP2			DMWD
RAB5B			HES3			CR1L			C5orf15			SHOX2			DNAH7
RABGAP1L			HES5			CRADD			C5orf30			SKA1			DNAJA2
RAD50			HESX1			CRBN			C5orf51			SKAP2			DNAJB12
RAD51AP2			HFE			CRLS1			C6orf120			SLAIN2			DNAJB4
RAD51C			HHEX			CROT			C6orf132			SLC16A3			DNAJC1
RALBP1			HIGD1A			CRTAP			C6orf203			SLC16A5			DNAJC10
RANBP3			HIST1H1T			CRYZ			C7orf26			SLC25A11			DNAJC12
RBBP6			HIST1H3C			CS			C7orf50			SLC25A19			DNAJC22
RBM12B			HIST1H3I			CSDE1			C8orf33			SLC25A22			DNAJC27
RBM23			HIST3H3			CSF3R			C8orf44			SLC25A33			DNAJC30
RBM48			HLTF			CTBP1			C9orf116			SLC26A1			DNAL1
RBMX			HMG20B			CTBP2			C9orf43			SLC39A8			DNALI1
RBX1			HMGCS1			CTBS			C9orf64			SLC40A1			DNASE2
RCC1			HMGN2			CTC1			CA14			SLC49A3			DNM1
RECQL5			HOXB2			CTF1			CAAP1			SLC7A5			DNM1L
RHEB			HOXB4			CTNND1			CACTIN			SLF1			DNTTIP2
RHOB			HOXB9			CTSA			CAD			SMAGP			DOK3
RIDA			HPN			CTSC			CAMK1			SMCO1			DPEP2
RING1			HPRT1			CTSH			CAMK2G			SNRPD2			DPH6
RNF149			HRASLS2			CWF19L1			CAMKK2			SNUPN			DPM2
RPAP3			HSD11B2			CWF19L2			CAMTA2			SNX12			DPM3
RPL22			HSD17B10			CYB561D1			CANT1			SNX24			DPP7
RPL23			HSF1			CYB5R1			CANX			SPAST			DPY19L4
RPL24			HSP90B1			CYBA			CAPG			SPATS2L			DPYSL2
RPL36AL			HSPB9			CYC1			CAPN1			SPG21			DRAM1
RPL39			HSPBP1			CYCS			CAPN2			SPTA1			DRC7
RPL4			HTATSF1			CYP20A1			CAPN7			SPTBN2			DRG2
RPL41			HYAL2			CYP3A7			CAPNS1			SRGAP2B			DSCC1
RPL6			ICA1L			CYP3A7-CYP3A51P			CAPRIN1			SRRM1			DSG2
RPL7L1			IER2			CYREN			CAPZA2			SSR4			DSN1
RPS15A			IFNAR2			D2HGDH			CARD6			ST6GALNAC6			DUS2
RPS18			IFRD1			DAZAP2			CARD9			STK25			DUSP1
RPS23			IFT88			DBI			CASC3			STK36			DUSP18
RPS9			IGF1			DBN1			CASP2			STRADB			DVL2
RSL1D1			IGFBP4			DBNL			CASP8			STX3			DYNLT1
RSL24D1			IGLV2-18			DBR1			CASP8AP2			SUDS3			DYRK1A
RTN4			IGLV3-1			DBT			CAST			SUPT16H			DYRK3
RWDD2B			IGLV3-12			DCAF10			CATSPERZ			SUSD1			E2F1
SAR1B			IGLV3-25			DCAF12			CBSL			SYNJ1			EBAG9
SARAF			IGLV5-48			DCAF15			CBWD6			TAF11L5			EBP
SART1			IGLV5-52			DCAF6			CC2D1A			TAF9			ECHS1
SBDS			IKBIP			DCAF8			CC2D1B			TARBP2			EDC3
SDC4			IL17RC			DCDC1			CCAR1			TDRD7			EED
SDF2			IL6R			DCLRE1A			CCDC12			TFAP4			EEPD1
SDHD			IMMP2L			DCP1B			CCDC124			TFEB			EFHB
SEC22C			IMPAD1			DCPS			CCDC126			TIMM44			EGR1
SEC31A			INTU			DCTN4			CCDC130			TIMM50			EIF2AK2
SELENOH			IRF1			DCUN1D1			CCDC137			TIMM9			EIF2B1
SEPHS2			IRF2BP1			DDAH2			CCDC138			TK1			EIF4A2
SESN2			IRGM			DDB1			CCDC152			TMEM102			EIF4E2
SH3GLB1			ISCA1			DDB2			CCDC167			TMEM115			EIF4EBP1
SKA2			ISY1			DDHD2			CCDC22			TMEM143			ELK4
SKA3			ITPKC			DDX1			CCDC25			TMEM191C			ELMO2
SKP1			JKAMP			DDX11			CCDC28B			TMEM231			ELOA
SLBP			KANK2			DDX17			CCDC32			TMEM237			EMC10
SLC20A1			KANK3			DDX20			CCDC34			TMEM80			EMC2
SLC25A36			KANSL3			DDX23			CCDC50			TMEM9			EMC3
SLC30A6			KAT7			DDX24			CCDC59			TMEM98			EME2
SLC7A6OS			KATNAL1			DDX28			CCDC69			TMLHE			ENDOD1
SMIM15			KBTBD6			DDX54			CCDC71			TMOD2			ENDOG
SNAI1			KCNQ5			DDX6			CCDC77			TNNI3			ENDOV
SNRNP70			KCTD13			DEDD			CCDC80			TOP1MT			ENO1
SNRPD1			KDELR1			DEF6			CCDC86			TRBV29-1			ENTR1
SNRPG			KDM5B			DENND1A			CCDC88A			TREX1			EPM2A
SOAT1			KHNYN			DENND1B			CCDC90B			TRIB3			EPOP
SPRY4			KIAA0753			DENND6A			CCDC93			TRIM3			EPS8
SPRYD4			KIAA1841			DENND6B			CCDC97			TRIM59			ERCC1
SQSTM1			KIF15			DENR			CCDC9B			TRIP12			ERCC6L
SRD5A3			KIF21B			DEPDC1			CCHCR1			TSKU			ERICH6
SRGAP2B			KIF23			DEPDC1B			CCNA2			TSPAN12			ERMAP
SRP72			KIF27			DEPP1			CCNB1			TTC30A			ERRFI1
SRP9			KISS1R			DESI1			CCNB1IP1			TXN2			ESYT2
SRSF3			KLF15			DEXI			CCNB2			TXNDC2			ETFBKMT
SRSF7			KLF2			DGCR2			CCNG1			TYMS			ETV1
SRSF9			KLHL24			DGCR6			CCNG2			UBA5			EXOC3
STAM			KLHL7			DGCR6L			CCNH			UBQLN1			EXOG
STARD5			KRCC1			DHDDS			CCNQ			UPF2			EXOSC9
STIL			KREMEN2			DHFR2			CCNT1			USP2			EXT1
STX6			KRT19			DHPS			CCP110			UVSSA			EYA3
SWSAP1			KYAT3			DHX16			CCPG1			VHL			F2RL3
SYCP2L			L2HGDH			DHX30			CCR10			WASHC1			FAAP24
SYF2			LAMP2			DHX36			CCS			WDR13			FAHD2A
SZT2			LAPTM4A			DHX57			CCSAP			WWOX			FAM111A
TADA3			LENG1			DIABLO			CCT2			XIRP1			FAM118B
TAF15			LFNG			DIMT1			CCT4			XKR8			FAM122A
TAF1B			LGALS1			DISP3			CCT8			XPNPEP1			FAM129A
TAF9			LGR4			DLAT			CD164L2			XRCC6			FAM161B
TAGLN2			LIN52			DLX1			CD2AP			ZBTB10			FAM173A
TBRG4			LIN7C			DMAP1			CD2BP2			ZBTB2			FAM180A
TDG			LKAAEAR1			DNAAF2			CD320			ZDHHC9			FAM185A
TECR			LMNA			DNAJB6			CD47			ZFAND6			FAM206A
TEN1-CDK3			LMO4			DNAJC11			CD53			ZFP69B			FAM219B
TFPI			LMOD1			DNAJC16			CD59			ZFYVE1			FAM229B
TFPT			LONRF3			DNAJC2			CD80			ZFYVE9			FAM241A
TGOLN2			LPIN3			DNAJC24			CD99L2			ZHX3			FAM49B
THADA			LRCH3			DNAJC3			CDC23			ZIC5			FAM53C
THOC2			LRRC8D			DNAJC30			CDC25A			ZMYND11			FAM71E1
TIMM22			LRRC8E			DNAJC4			CDC27			ZNF18			FAM90A1
TIMM50			LSM12			DNAJC8			CDC42			ZNF32			FANCC
TINF2			LSM4			DNM1			CDC5L			ZNF324B			FANCL
TM9SF4			LTV1			DNTTIP1			CDC7			ZNF337			FARP2
TMED2			LY6E			DOLK			CDC73			ZNF384			FBXL8
TMEM126A			LYRM2			DOLPP1			CDCA2			ZNF420			FBXO21
TMEM165			LYSMD2			DPM1			CDCA4			ZNF423			FBXO22
TMEM209			MAFG			DRAM2			CDCA7			ZNF442			FBXO7
TMEM267			MAN2A1			DSCC1			CDCA8			ZNF652			FBXO8
TMEM68			MANBA			DSG2			CDH24			ZNF687			FBXW2
TMSB4X			MAP10			DSTN			CDIPT			ZNF785			FCHSD1
TMX2			MAP1B			DTWD1			CDK1			ZNF93			FDFT1
TMX2-CTNND1			MAP1LC3B2			DTWD2			CDK17						FDX1
TOMM70			MAP3K20			DTX2			CDK4						FERMT3
TP53			MAP4K5			DUS2			CDK5RAP1						FEZ2
TPI1			MAP7			DUSP1			CDK5RAP3						FGF2
TPK1			MAPK1IP1L			DUSP11			CDK6						FGF22
TPT1			MAPRE1			DUX4			CDK9						FIBCD1
TRAF4			MBD4			DYRK3			CDKAL1						FIS1
TRAFD1			MBNL1			E2F6			CDKL3						FKBP2
TRIM24			MBOAT7			EBAG9			CDKN1A						FKBP7
TRIM59			MBTPS1			ECH1			CDKN3						FLOT2
TROAP			MCCC2			ECI1			CDON						FLVCR1
TTC21B			MCFD2			ECSIT			CDR2L						FNDC4
TUBA1C			MCM3			EDC4			CDT1						FNTB
TXNRD1			MCM5			EEF1AKMT2			CDYL						FOXD2
TYK2			MCM9			EEF1G			CEBPZOS						FOXJ3
UBALD2			MECR			EEF2KMT			CELA2B						FOXP1
UBB			MED13L			EHMT2			CENPA						FPGT
UBE2A			MED26			EI24			CENPF						FPGT-TNNI3K
UBE2T			MED27			EIF1AD			CENPO						FRS2
UBE2Z			METTL27			EIF2B3			CENPQ						FSIP1
UBL7			METTL4			EIF2B5			CENPS						FURIN
UBR2			MFSD6			EIF2D			CENPU						FUT11
UCHL5			MIER3			EIF2S1			CENPW						FUZ
UFC1			MINDY1			EIF3M			CEP104						FXN
USO1			MIS18A			EIF4E			CEP120						FYN
USP1			MLKL			EIF5B			CEP152						FZD9
USP8			MMP9			ELK4			CEP162						G3BP2
VAPA			MOB1B			ELL			CEP19						GABPB1
WASF2			MOK			ELOA			CEP295						GABRE
WBP11			MORC3			ELOVL6			CEP350						GADD45G
WDCP			MORF4L2			ELP1			CEP44						GALNT12
WDR45			MPLKIP			ELP4			CEP55						GALNT4
WDR74			MPP5			EMC10			CEP63						GALNT5
WEE1			MRGPRE			EMC2			CEP72						GALNT6
WSB1			MRPL10			EMC6			CEP83						GALT
YAE1			MRPL19			EME1			CFAP20						GAPDH
YDJC			MRPL28			EME2			CFAP206						GAS2L3
YIPF3			MRPL37			EMG1			CFAP410						GAS8
YWHAE			MRPS6			ENSA			CFAP69						GATA1
YWHAH			MRPS7			EP300			CFL2						GATA2
ZER1			MSANTD4			EPB41L2			CGGBP1						GBE1
ZHX1			MSMO1			EPHX1			CHAF1B						GBGT1
ZKSCAN3			MSRA			EPS8L3			CHAMP1						GCFC2
ZNF143			MSRB1			ERCC6L2			CHCHD1						GDF9
ZNF184			MSRB2			ERGIC1			CHCHD3						GEMIN7
ZNF260			MTPAP			ERMARD			CHD1L						GFOD2
ZNF280A			MTRNR2L1			ERV3-1			CHD2						GFPT1
ZNF280C			MTRNR2L11			ERVK3-1			CHD4						GGT7
ZNF346			MTRNR2L7			ESCO2			CHD6						GGTLC2
ZNF391			MUTYH			ESD			CHD8						GINS3
ZNF414			MXI1			ESRRA			CHEK1						GIPR
ZNF43			MYL9			ETAA1			CHERP						GK5
ZNF497			MYO1C			ETFRF1			CHID1						GLB1L
ZNF546			NAA60			ETS2			CHM						GLCCI1
ZNF669			NANOS1			ETV4			CHMP1B						GLMN
ZNF670			NCBP1			EVI5			CHMP4A						GLOD4
ZNF675			NCBP2			EXD3			CHMP4B						GMCL1
ZNF680			NCEH1			EXOC3			CHORDC1						GNL3
ZNF681			NCK1			EXOC4			CHP1						GNPAT
ZNF689			NCL			EXOC5			CHPF						GNPDA1
ZNF789			NCLN			EXOC6			CHST14						GOLGA1
ZNF830			NCOA2			EXOSC2			CHTOP						GOLGA4
ZNF878			NCOA6			EXT2			CIAO1						GOLGA6L2
ZSWIM3			NDFIP2			FAAP24			CIAO2B						GOLGA6L7
ZSWIM7			NDUFA8			FADD			CILP2						GOLPH3
ZWINT			NDUFS8			FAF1			CINP						GORASP2
H1-2			NEK8			FAM118B			CIR1						GPANK1
H1-4			NETO2			FAM133B			CISD1						GPATCH11
H2AC13			NF2			FAM162A			CIT						GPHN
H2AC16			NFIA			FAM200A			CKAP2						GPR107
H3C4			NFKBIB			FAM206A			CKAP5						GPR37L1
H2AC20			NFKBID			FAM208A			CKMT1A						GRAMD1A
H1-5			NFYA			FAM219B			CLDN23						GRHL1
H1-3			NLN			FAM227B			CLDN4						GRINA
H2AC14			NLRX1			FAM234A			CLDND1						GSDMD
H2BC9			NME3			FAM241A			CLEC16A						GSTM4
H3C1			NMRK1			FAM3C			CLIC2						GSTP1
H3C7			NOL3			FAM49B			CLINT1						GTF3C3
H4C2			NOL4L			FAM53C			CLIP1						GTF3C6
H4C3			NONO			FAM71E1			CLK1						GTSF1
H4C8			NPAS1			FAM91A1			CLK4						H1-3
H4C11			NPAT			FAM98B			CLN6						H1-4
H2AC19			NPHP3			FANCD2			CLN8						H2AC12
H3C15			NR1D2			FANCG			CLPB						H2AC19
H4C15			NR2C1			FANCI			CLPP						H2AC20
H2AW			NR2F6			FARP2			CLSPN						H2AFY
H2AC4			NRBP1			FASTKD2			CLTA						H2AFZ
H2AC12			NRF1			FBF1			CLUH						H2BC4
H2AC17			NRIP1			FBXL18			CMAS						H2BC8
H2BC1			NT5M			FBXL8			CMBL						H2BFS_r1
H2BC8			NTAN1			FBXO21			CMKLR1						H3-2
H3C2			NUB1			FBXO4			CMTM3						H3C10
H3C10			NUDC			FBXW2			CMTR1						H3C12
H3C12			NUDT13			FBXW8			CMTR2						H3C15
H4C4			NUF2			FDX2			CNEP1R1						H3C2
H4C5			NUMA1			FEM1B			CNOT1						H3F3B
H4C12			OCIAD1			FEN1			CNOT10						H4C1
H2BC18			OGFOD2			FGFBP3			CNOT3						H4C12
H3C13			OR52D1			FGFR3			CNOT4						H4C14
H3-2			OR7G1			FH			CNOT6						H4C15
H4C14			ORAI3			FHOD1			CNOT6L						H4C2
H2BC4			OSBPL3			FICD			CNPPD1						H4C4
H4C1			OSTC			FITM2			CNPY2						H4C5
			OTX1			FKBP9			CNTRL						H4C8
			OXA1L			FKRP			COA1						HASPIN
			PA2G4			FLOT2			COASY						HAT1
			PAPSS1			FLYWCH1			COG2						HAUS2
			PARP1			FLYWCH2			COG3						HAUS4
			PARP12			FN3K			COG8						HAUS8
			PCBP3			FOXJ3			COIL						HBD
			PCED1A			FRG2C			COL23A1						HDAC3
			PCGF1			FRMD8			COMMD1						HDHD2
			PCGF5			FRS2			COMMD3-BMI1						HEBP2
			PCK2			FSCN1			COMMD4						HECTD4
			PDCD2L			FSIP1			COMMD8						HEMK1
			PDCL			FUCA2			COMMD9						HERPUD1
			PDCL3			FUT10			COMTD1						HEXA
			PDE6G			FUT11			COPA						HEXDC
			PDHX			FXN			COPB1						HEXIM2
			PDIA4			GABPA			COPB2						HEY2
			PDIA5			GADD45G			COPE						HFM1
			PELI3			GAK			COPS2						HHLA3
			PEX16			GAL3ST4			COPS5						HIC2
			PFDN6			GANAB			COPZ1						HIGD2A
			PGK2			GAPDH			COQ10B						HIP1R
			PGLS			GAR1			COQ2						HIRIP3
			PHF3			GBA			COQ3						HMGA1
			PHF6			GBF1			COQ6						HNRNPDL
			PHF7			GCFC2			COQ7						HPS4
			PHLDB1			GDF9			COQ8B						HSD17B6
			PHLDB3			GDPGP1			CORO1C						HSP90AB1
			PI4KA			GEMIN7			CORO6						ICA1
			PIEZO1			GFER			CORO7						ICAM1
			PIGH			GFM1			CORO7-PAM16						ICAM3
			PIK3CG			GFOD2			COTL1						ID1
			PIM3			GGA1			COX11						IER2
			PIP4K2B			GGA2			COX14						IER5
			PIP5KL1			GGCX			COX17						IFI27L1
			PITPNM1			GGN			COX18						IFI30
			PITPNM2			GGT7			COX19						IFIT3
			PLAU			GLA			COX5A						IFITM2
			PLD1			GLB1L			COX6C						IFRD1
			PLD6			GLB1L2			COX7B						IFT22
			PLEKHA4			GLMN			COX7C						IFT80
			PLEKHA5			GLOD4			COX8A						IGHMBP2
			PLEKHG4			GLS			CPA1						IGLJ2
			PLEKHJ1			GLUL			CPD						IGLV3-19
			PLEKHM2			GMEB1			CPNE3						IKBKE
			PLEKHO1			GMNN			CPNE7						IL10RA
			PLP2			GMPS			CPNE8						IL27RA
			PLPPR2			GNAI3			CPSF1						IL6
			PLTP			GNB1			CPSF2						ILK
			PMVK			GNB1L			CPSF6						IMMT
			POLA1			GNB4			CPT1A						IMP3
			POLA2			GNG8			CPT2						IMPAD1
			POLB			GNL2			CR2						ING3
			POLD2			GNL3			CRACR2A						ING5
			POLR2D			GNPAT			CRADD						INKA2
			POLR2G			GNPTG			CRCP						INO80C
			POLR2H			GOLGA5			CREB3L2						INPP5K
			POLR2I			GOLGA6L7			CREBZF						INTS3
			POLR3K			GOLGA7			CREG1						INTS5
			POLRMT			GORASP2			CRISPLD2						IPPK
			POMK			GOT2			CRK						IQCE
			POPDC3			GP1BB			CRY2						IQGAP3
			PPIA			GPANK1			CS						IRAK1BP1
			PPOX			GPAT3			CSNK2A1						IRAK4
			PPP1R35			GPATCH11			CSRP1						IRF3
			PPP1R7			GPATCH3			CST3						ISG15
			PPP2R3C			GPATCH4			CSTB						ISPD
			PPT2			GPCPD1			CSTF2						IST1
			PRDM15			GPHN			CSTF2T						ISY1
			PREB			GPN2			CSTF3						ITFG2
			PRELID3B			GPR107			CTF1						ITGA5
			PRF1			GPR137			CTNNBL1						ITGAV
			PRKCB			GPR161			CTNND1						ITGB3
			PRKN			GPR85			CTR9						ITGB5
			PRMT1			GPR89A			CTSH						ITPA
			PRPF39			GPS2			CTSZ						ITPK1
			PRPS1			GPX4			CTU1						ITPR1
			PRRC2C			GRHPR			CUL5						ITPR2
			PRSS16			GRIPAP1			CWF19L1						ITPRIPL1
			PRXL2A			GSKIP			CWF19L2						ITSN2
			PRXL2C			GSS			CXorf40B						JADE1
			PSEN2			GSTCD			CXorf56						JKAMP
			PSMD4			GSTO1			CXXC5						JRK
			PSME2			GTF2A2			CYB5B						JUND
			PSMG3			GTF2F2			CYB5R4						KANK3
			PSPC1			GTF2H3			CYC1						KANSL1
			PTBP1			GTF3C2			CYP20A1						KAT5
			PTBP2			GTF3C3			CYP2R1						KATNA1
			PTCH2			GTSF1			CYP3A7						KATNBL1
			PTMA			GYG1			CYP3A7-CYP3A51P						KBTBD4
			PTMS			GYPA			CYR61						KCTD11
			PTP4A3			GYPB			CYREN						KCTD20
			PTPA			GYPE			CYTH2						KCTD3
			PUS10			H2BFS_r1			D2HGDH						KCTD7
			PVR			HACD3			DAAM1						KDELC2
			PXK			HACE1			DAD1						KDM1A
			PXMP4			HADH			DAND5						KDM4A
			PXN			HAGHL			DAP						KDM4B
			PYGB			HAUS2			DAP3						KDM4D
			QPRT			HAUS5			DAPK1						KDM5A
			QSER1			HBB			DAPK3						KDSR
			QSOX2			HBS1L			DBNDD2						KEAP1
			RAB11B			HCCS			DBR1						KEL
			RAB23			HEATR3			DCAF10						KIAA0753
			RAB3A			HEMK1			DCAF7						KIAA1586
			RAB8B			HERPUD2			DCTN2						KIF13B
			RAD1			HES6			DCUN1D4						KIF16B
			RAD21			HEXA			DCUN1D5						KIF17
			RAD51D			HEXB			DCXR						KIF3A
			RAD54L			HEXDC			DDI2						KIF3C
			RAET1E			HEY2			DDIT4						KIF9
			RALGDS			HEYL			DDX10						KIFAP3
			RALGPS2			HIC2			DDX17						KLF10
			RAN			HIF1AN			DDX18						KLHDC2
			RASA1			HIGD2A			DDX21						KLHDC4
			RASA3			HINT2			DDX23						KLHL20
			RBBP7			HIRIP3			DDX24						KLHL7
			RBCK1			HIST1H2BB			DDX27						KMT5A
			RBM19			HIST1H4G			DDX39A						KPTN
			RBM6			HIST1H4I			DDX41						KRBA2
			RBMXL1			HJURP			DDX42						KREMEN2
			RCN2			HMBS			DDX47						KRIT1
			RDH11			HMG20A			DDX52						KRT10
			RDH14			HMGB3			DDX56						LACTBL1
			REEP6			HMGN3			DDX59						LAGE3
			REXO2			HMGXB3			DEF6						LAMA5
			RFPL4B			HMOX2			DEFB133						LAMTOR5
			RFX5			HNRNPA0			DEGS1						LANCL2
			RGCC			HNRNPAB			DENND4B						LAPTM4A
			RGPD2			HNRNPC			DENR						LBR
			RGS10			HNRNPH3			DEPDC1						LCMT2
			RHEBL1			HNRNPL			DEPDC4						LDAH
			RHOA			HNRNPUL2			DEPDC7						LDB1
			RHOC			HPF1			DEPP1						LEPROTL1
			RHOH			HPGD			DERL1						LIMA1
			RHOV			HSD17B6			DEXI						LIN54
			RILPL2			HSDL1			DFFA						LIN7C
			RIMBP3			HSF2BP			DGUOK						LIN9
			RNASEH2C			HSPA14			DHCR24						LIPT2
			RNASEL			HSPA1A			DHDH						LMBR1L
			RNF10			HSPA4L			DHH						LMBRD2
			RNF103			ICA1			DHRS13						LMF1
			RNF111			ICAM4			DHRS2						LMNB2
			RNF126			IDH2			DHRS7B						LONRF2
			RNF141			IER3			DHTKD1						LPAR5
			RNF168			IER5L			DHX15						LPIN1
			RNF183			IFFO2			DHX36						LRCH1
			RNF219			IFI27L1			DHX37						LRRC25
			RNF224			IFITM1			DHX38						LRRC46
			RNMT			IFT57			DHX40						LRRC47
			ROM1			IFT74			DHX58						LRRC57
			RP2			IGBP1			DIAPH1						LRRC71
			RP9			IGF2BP3			DIAPH3						LRRFIP2
			RPL19			IGHMBP2			DICER1						LRSAM1
			RPP30			IGLV2-11			DIDO1						LSM11
			RPRML			IGLV9-49			DIS3						LSM7
			RPS6KB2			IKBKE			DKKL1						LSM8
			RPS6KC1			IL15RA			DLD						LTK
			RSC1A1			IL2RG			DLG1						LTV1
			RSPH14			ILK			DLGAP5						LY6G6F-LY6G6D
			RTN4IP1			ILVBL			DLL4						LYL1
			RXRB			IMPDH2			DLX2						LYPD3
			S100A11			ING5			DMXL2						LYRM1
			SAC3D1			INHA			DNAH14						LZTR1
			SART3			INO80B			DNAJA3						MACC1
			SBF2			INO80E			DNAJB2						MACROD1
			SCGB1A1			INTS10			DNAJC11						MAGEA12
			SCRT2			INTS12			DNAJC13						MAGEA2B
			SCUBE3			INTS8			DNAJC16						MAGEA3
			SDHAF3			IPO11			DNAJC17						MAML1
			SDHB			IPO9			DNAJC18						MAML3
			SEC24D			IQCC			DNAJC2						MAN1A1
			SELENOS			IRAK1			DNAJC21						MAN2A2
			SEM1			IRAK4			DNAJC24						MAN2C1
			SEMA6B			IRX5			DNAJC8						MANEAL
			SEMA7A			ISPD			DNAJC9						MAP1B
			SEPHS1			ITFG1			DNAL4						MAP1LC3B
			SERPINF1			ITGB3BP			DNASE1L1						MAP1S
			SF1			ITGB5			DNMT1						MAP2K5
			SFXN1			ITM2B			DNTTIP1						MAP3K2
			SGK3			ITPA			DOCK8						MAPK3
			SH2D3C			ITPR2			DOHH						MAPK6
			SH3BGR			IWS1			DPF2						MAPK7
			SH3BGRL3			JADE1			DPH1						MBD1
			SHOX2			JAGN1			DPH2						MBD2
			SIPA1L3			JAK1			DPH5						MBLAC2
			SIRT6			JMJD1C			DPH7						MCEMP1
			SKAP2			JMJD4			DRG1						MCFD2
			SLC20A2			JRK			DSTN						MCMBP
			SLC22A23			KATNA1			DTNBP1						MCRIP1
			SLC25A11			KBTBD2			DTWD1						MCUB
			SLC25A17			KBTBD4			DTX2						MDC1
			SLC25A30			KCNK5			DUSP11						MDH1B
			SLC25A39			KCNN4			DUSP13						ME1
			SLC25A41			KCTD20			DUSP22						MECR
			SLC25A5			KCTD3			DUSP23						MED1
			SLC2A3			KCTD5			DUSP28						MED11
			SLC30A2			KDELC1			DUSP3						MED13L
			SLC35G2			KDELC2			DUX4						MED18
			SLC37A4			KDELR3			DYNC1H1						MEIG1
			SLC40A1			KDM5C			DYNC1I2						MESP2
			SLC41A1			KDM6B			DYNC1LI1						METTL2B
			SLC43A1			KEAP1			DYNC2LI1						METTL4
			SLC4A7			KEL			DYNLL2						MFAP3
			SLC5A3			KIAA0895L			DYRK1B						MFHAS1
			SLC6A9			KIDINS220			DYRK2						MFN1
			SLC7A1			KIF13B			E2F2						MFSD1
			SLC7A11			KIF14			E2F6						MFSD10
			SLF1			KIF20B			E4F1						MFSD3
			SMAGP			KIF21A			EAPP						MFSD5
			SMS			KIF5B			EBNA1BP2						MFSD8
			SMTN			KIF9			ECHDC3						MGST2
			SMUG1			KLF1			ECI1						MICALL2
			SMYD2			KLF9			ECM1						MIER2
			SMYD4			KLHDC1			ECSIT						MILR1
			SMYD5			KLHL17			ECT2						MINK1
			SNIP1			KLHL20			EDC4						MINPP1
			SNRNP48			KLHL36			EDEM3						MKNK2
			SNRPD2			KLHL42			EEF1AKMT2						MLEC
			SNU13			KNL1			EEF1B2						MLST8
			SNX14			KNSTRN			EEF1D						MMGT1
			SNX33			KPTN			EEF1E1						MMP17
			SOCS1			KRI1			EEF1G						MMP19
			SOX18			KTI12			EEF2						MMP9
			SP9			L3MBTL2			EEF2KMT						MOCS2
			SPATA24			LACTB2			EFCAB11						MOGS
			SPATS2L			LACTBL1			EFCAB14						MPHOSPH8
			SPCS1			LAGE3			EFNA1						MPHOSPH9
			SPDL1			LAMB1			EFNA3						MPV17
			SPI1			LANCL2			EFNA4						MPZL1
			SPN			LAPTM4B			EFNB2						MR1
			SPRY1			LARP4B			EFTUD2						MRAP2
			SQLE			LBH			EHD2						MRFAP1
			SRM			LCMT2			EI24						MRGPRE
			SRR			LCP2			EID2						MRNIP
			SRSF11			LEMD2			EID2B						MRPL22
			SRXN1			LEMD3			EIF1						MRPL27
			SSC4D			LEO1			EIF1AX						MRPL36
			SSR2			LHFPL2			EIF2AK1						MRPL38
			SSR4			LIAS			EIF2B2						MRPL41
			ST13			LIG1			EIF2D						MRPL42
			ST6GALNAC1			LIN9			EIF2S3						MRPL43
			ST7			LINC02210-CRHR1			EIF3A						MRPL48
			STAM2			LMAN2			EIF3D						MRPL9
			STAMBP			LMBR1L			EIF3G						MRPS12
			STARD7			LMF1			EIF3L						MRPS15
			STPG1			LMLN			EIF4B						MRPS27
			STRADB			LMNB2			EIF4EBP3						MRPS36
			STXBP4			LMTK2			EIF4H						MRRF
			STYX			LONP1			EIF5						MSANTD2
			SUB1			LONP2			EIPR1						MSX1
			SUFU			LPIN1			ELAC1						MT2A
			SULT1A3			LRCH4			ELF1						MTERF4
			SULT1A4			LRRC57			ELL						MTFR1L
			SUMO1			LRRC58			ELL2						MTHFSD
			SUOX			LRRC71			ELL3						MTMR1
			SWT1			LRRCC1			ELMOD2						MTMR6
			SYT3			LRRFIP2			ELOC						MTPAP
			TAF11L6			LRSAM1			ELOVL5						MTRNR2L4
			TAF11L8			LSM1			ELP1						MTRNR2L6
			TAF11L9			LSM11			ELP2						MTSS1L
			TAPT1			LSM5			EMC4						MYBL2
			TARBP1			LSM7			EMC7						MYEOV
			TBC1D23			LYN			EMC8						MYL12B
			TBCA			LYPLAL1			EME1						MYL9
			TBP			LYRM1			EMG1						MYO18A
			TBPL1			LZTR1			EMID1						N4BP1
			TBX19			LZTS2			EMILIN1						NAA16
			TCN2			MAD2L1BP			EML4						NAA25
			TEAD2			MAEA			EMP3						NAA40
			TEAD4			MAFF			ENGASE						NAGK
			TECPR1			MAGEA2B			ENKD1						NAGLU
			TENT5A			MAGEF1			ENSA						NAXE
			TES			MAGEH1			EOGT						NBN
			TEX261			MAML1			EPB41						NCAPD2
			TEX30			MAN2A2			EPB41L5						NCAPH
			TFAP4			MANBAL			EPC1						NCBP2-AS2
			TFCP2			MANEAL			EPCAM						NCR3LG1
			TGFBRAP1			MAP1LC3B			EPG5						NCSTN
			TGIF2			MAP2K1			EPHX1						NDC80
			THAP1			MAP2K5			EPM2AIP1						NDOR1
			THAP8			MAP3K6			EPOR						NDUFA13
			TIGD7			MAP4			ERAP2						NDUFA7
			TIMM44			MAP4K3			ERCC4						NDUFA8
			TJP1			MAPT			ERCC6						NDUFAF1
			TLCD1			MARCKSL1			ERCC8						NDUFAF3
			TM6SF1			MAU2			ERGIC1						NDUFAF7
			TMED10			MAZ			ERGIC3						NDUFB1
			TMEM115			MBLAC2			ERH						NDUFB5
			TMEM145			MCIDAS			ERI2						NDUFB9
			TMEM214			MCM4			ERI3						NDUFS3
			TMEM219			MCRS1			ERLIN2						NEDD1
			TMEM237			MDH1B			ERMARD						NEIL2
			TMEM56			MDM2			ERMP1						NEK8
			TMEM59			MDP1			ERN1						NEK9
			TMEM63B			MED1			ERO1B						NELFE
			TMEM69			MED15			ERVK3-1						NEU3
			TMEM80			MED17			ESCO2						NEURL2
			TMEM9			MED20			ESPN						NFATC2
			TMEM99			MED21			ESS2						NFKBIE
			TMLHE			MED28			ETFA						NFYC
			TMOD2			MED31			ETFRF1						NHEJ1
			TNFRSF10B			MED4			ETV5						NHLRC4
			TOP1MT			MED9			EVL						NIF3L1
			TP53TG3			MEF2A			EWSR1						NIPBL
			TP53TG3C			MEIOB			EXD3						NIT1
			TP53TG3D			MELTF			EXO1						NIT2
			TPBGL			METAP1			EXOC1						NKIRAS1
			TPTEP2-CSNK1E			METRNL			EXOC3L2						NKIRAS2
			TRBV16			METTL25			EXOC4						NMNAT1
			TRGV10			METTL3			EXOC5						NMRAL1
			TRGV4			METTL7A			EXOC6						NOS3
			TRIB3			METTL8			EXOSC10						NPC1
			TRIM14			MFAP1			EXOSC2						NPM1
			TRIM45			MFHAS1			EXOSC4						NPRL2
			TRIM47			MFN2			EXOSC6						NPRL3
			TRIM58			MFSD8			EXPH5						NR1D2
			TRIOBP			MIA3			EXT2						NR1H2
			TRIP12			MIF			EZH1						NR1H3
			TSACC			MINOS1-NBL1			EZR						NRN1L
			TSC22D1			MKI67			F2R						NSMCE1
			TSC22D2			MKNK1			FABP5						NSMF
			TSNARE1			MKRN2			FADD						NSUN6
			TSPAN12			MLEC			FADS1						NT5C
			TSPAN32			MLH3			FADS3						NT5M
			TTC30A			MLST8			FAF1						NUDCD3
			TTLL10			MMADHC			FAM110A						NUDT1
			TUBA4A			MNAT1			FAM110D						NUP188
			TUBGCP4			MOAP1			FAM117A						NUP214
			TUBGCP5			MOB1A			FAM118A						NXF1
			TXNDC2			MPHOSPH8			FAM120B						OAF
			TXNL4B			MPHOSPH9			FAM122B						OAT
			TYROBP			MPV17			FAM122C						OLA1
			UBE2D1			MRAP2			FAM133B						OPLAH
			UBE2G1			MRE11			FAM136A						OPN3
			UBL3			MRFAP1			FAM13A						OR4F17
			UBXN11			MRPL1			FAM149B1						OR4F5
			UCK2			MRPL12			FAM167B						ORC5
			UGT8			MRPL13			FAM168B						OSBPL8
			UNC45A			MRPL14			FAM184A						OSBPL9
			UNG			MRPL20			FAM207A						OTUD6B
			UPRT			MRPL22			FAM214B						OTULIN
			USB1			MRPL32			FAM219A						P3H3
			USH1G			MRPL33			FAM222B						P4HA1
			USP13			MRPL35			FAM234B						PAFAH1B2
			USP17L2			MRPL36			FAM32A						PAFAH1B3
			USP25			MRPL38			FAM83D						PAGR1
			USP33			MRPL39			FAM84A						PAIP1
			USP51			MRPL4			FAM86C1						PANK4
			UTP15			MRPL40			FAM98B						PAPOLA
			UTP6			MRPL41			FAM98C						PAPSS1
			UVSSA			MRPL42			FANCD2						PARP4
			VAMP5			MRPL44			FANCF						PARP9
			VCPKMT			MRPL46			FANCG						PBLD
			VPS13C			MRPL48			FANCI						PCNT
			VPS36			MRPL50			FANCM						PDE4DIP
			VRK1			MRPL52			FAR1						PDK1
			VWA1			MRPL58			FASTKD1						PDSS2
			VWDE			MRPS10			FAXDC2						PDXDC1
			WASHC1			MRPS12			FBRSL1						PDZD11
			WBP1			MRPS27			FBXL12						PEBP1
			WDR76			MRPS28			FBXL15						PEF1
			WDR91			MRPS34			FBXL17						PFDN2
			WHAMM			MSH6			FBXO4						PGAM5
			WNT9A			MTDH			FBXO42						PGAP3
			XPA			MTFR2			FBXO46						PGM3
			XPC			MTG1			FBXO6						PGRMC2
			XPO4			MTHFD1L			FBXW9						PHB2
			XPO5			MTHFR			FCRLA						PHF20
			XPR1			MTMR1			FCRLB						PHF23
			XRCC3			MTMR10			FDX2						PHKG2
			XRCC5			MTRF1			FECH						PHLDA2
			YBX1			MTRNR2L10			FEM1A						PHRF1
			YIPF5			MTRNR2L12			FEM1C						PIAS2
			YPEL2			MTRNR2L6			FER						PIGB
			YPEL4			MTSS1L			FGFBP3						PIGBOS1
			YPEL5			MTX2			FGFR1OP						PIGH
			YTHDC1			MUS81			FGFR3						PIGO
			YTHDF1			MYBBP1A			FGFRL1						PIH1D1
			YWHAB			MYBL2			FGGY						PIH1D2
			ZADH2			MYLIP			FH						PIK3C3
			ZBED8			MYO18B			FHIT						PIK3R1
			ZBTB17			NAA25			FHOD1						PIP4K2C
			ZBTB47			NAA38			FIBP						PIP4P2
			ZC3H11A			NAA50			FICD						PIWIL4
			ZC3H8			NAE1			FIP1L1						PKMYT1
			ZC3HAV1			NAF1			FITM2						PKP4
			ZFP36			NAGPA			FIZ1						PLA2G4C
			ZFP36L2			NAGS			FKBP1A						PLAGL1
			ZFPM2			NANS			FKBP4						PLCB3
			ZFX			NAT10			FKBP5						PLEC
			ZFYVE1			NAT14			FKBP9						PLEKHF1
			ZNF160			NAT9			FLAD1						PLEKHG4
			ZNF20			NAXE			FLNA						PLEKHM1
			ZNF215			NBL1			FLNB						PLEKHM2
			ZNF217			NBPF26			FLYWCH1						PLSCR3
			ZNF222			NBPF4			FN3K						PMAIP1
			ZNF226			NCAPG2			FNBP1						PNPLA4
			ZNF254			NCOA5			FNBP4						POFUT1
			ZNF257			NDFIP1			FNDC11						POLDIP2
			ZNF280D			NDUFA12			FOPNL						POLE2
			ZNF316			NDUFA5			FOXA3						POLE4
			ZNF32			NDUFA6			FOXL2NB						POLR1A
			ZNF417			NDUFA7			FRAT1						POLR1E
			ZNF441			NDUFAF1			FRG1						POLR2K
			ZNF473			NDUFAF3			FRRS1						POLR2L
			ZNF480			NDUFAF4			FSD1L						POMZP3
			ZNF552			NDUFAF5			FUBP1						PON2
			ZNF57			NDUFAF7			FUCA1						PPARD
			ZNF571			NDUFAF8			FUCA2						PPHLN1
			ZNF580			NDUFB1			FUNDC1						PPID
			ZNF627			NDUFB9			FUNDC2						PPIL2
			ZNF638			NDUFC2			FUT4						PPIL4
			ZNF665			NDUFC2-KCTD14			FXR1						PPM1G
			ZNF69			NDUFS6			FYB1						PPP1R35
			ZNF700			NDUFV2			FYCO1						PPP3CC
			ZNF771			NECAP2			FYTTD1						PPP4C
			ZNF780A			NEDD1			FZD1						PPT1
			ZNF839			NEDD4			G2E3						PPTC7
			ZNF844			NEK1			GABARAPL2						PRDX2
			ZNF845			NEK4			GADD45A						PRICKLE3
			ZNF93			NEK9			GADD45GIP1						PRKAG1
			ZSCAN31			NELFA			GAGE1						PRKAR1A
						NEPRO			GAGE2A						PRMT2
						NEURL2			GAK						PRMT7
						NFAT5			GAL						PROCA1
						NFATC1			GALM						PRPF31
						NFATC2IP			GALNT11						PRPF38A
						NFE2			GAMT						PSMA2
						NFE2L3			GANAB						PSMA4
						NFE4			GAR1						PSMC2
						NFIC			GART						PSMD2
						NFKBIE			GBA2						PSMG2
						NFKBIL1			GBF1						PSPC1
						NFKBIZ			GCAT						PTEN
						NFXL1			GCC2						PTGFRN
						NFYB			GCLC						PTMA
						NGB			GCLM						PTPRU
						NGRN			GCN1						PUF60
						NIPBL			GCNT2						PURA
						NIPSNAP3B			GCSH						PWP1
						NISCH			GDF15						PXK
						NKIRAS1			GDPD3						PYCARD
						NKIRAS2			GEMIN2						PYROXD1
						NKTR			GEMIN4						QPRT
						NMI			GEMIN5						QRICH1
						NMNAT1			GEMIN6						QSOX2
						NMNAT3			GFER						RAB19
						NMRAL1			GFM1						RAB21
						NOD1			GFOD1						RAB24
						NOL9			GGCX						RAB26
						NOM1			GGH						RAB2A
						NOP10			GHDC						RAB40C
						NOP53			GHITM						RAB5A
						NOP58			GIGYF2						RABEP1
						NOS3			GIN1						RAC2
						NOSIP			GINM1						RAD51C
						NPB			GJD3						RAD9A
						NPLOC4			GLB1L2						RALA
						NQO2			GLE1						RANBP2
						NR1H2			GLG1						RASL11B
						NR1H3			GLI4						RBM15B
						NR4A3			GLIPR2						RBM20
						NRBF2			GLO1						RBM34
						NRBP2			GMDS						RBM8A
						NRSN2			GMFB						RBSN
						NSL1			GMPPB						RCBTB2
						NSMCE1			GMPS						RCC1
						NSMCE3			GNAT2						RCE1
						NSMCE4A			GNG5						RCN2
						NSUN2			GNG8						RECQL5
						NUDT1			GNL2						REEP3
						NUDT12			GNPNAT1						REM2
						NUDT16L1			GNPTAB						REPS1
						NUDT19			GNS						REST
						NUDT22			GOLGA5						REX1BD
						NUFIP1			GOLGB1						REXO2
						NUP107			GOLT1B						RFPL4B
						NUP133			GON4L						RFXANK
						NUP188			GOPC						RGS10
						NUP205			GOSR1						RHAG
						NUP210			GOSR2						RICTOR
						NUP214			GOT1						RIOK1
						NUP58			GOT2						RIOX1
						NUPL2			GPAA1						RIPK1
						NUS1			GPAT3						RITA1
						NVL			GPAT4						RLF
						ODC1			GPC5						RLN3
						OGA			GPI						RMDN3
						OGDH			GPN1						RMND5A
						OGT			GPR108						RNASEL
						OR4F21			GPR137						RNASET2
						OR4F4			GPR160						RND1
						OSBPL8			GPR161						RNF11
						OSGEPL1			GPR180						RNF113A
						OTUB1			GPR63						RNF114
						OTUD6B			GPX4						RNF123
						OTUD7B			GRB2						RNF130
						OTULIN			GRHPR						RNF138
						OVCA2			GRIPAP1						RNF166
						OXNAD1			GRN						RNF19B
						P4HA1			GRPEL2						RNF41
						PAIP1			GRSF1						ROPN1L
						PAK1IP1			GSKIP						RPAIN
						PAK2			GSPT1						RPL13
						PAPOLG			GSS						RPL14
						PARL			GSTO1						RPL15
						PARP16			GTF2B						RPL28
						PBK			GTF2E2						RPL31
						PCBD2			GTF2F1						RPL37A
						PCCB			GTF2F2						RPP40
						PCID2			GTF2H5						RPS5
						PCIF1			GTF2IRD2B						RPS6KA3
						PCLAF			GTF3C5						RPS8
						PCNA			GTPBP3						RPUSD2
						PCNX4			GTPBP4						RPUSD4
						PCSK7			GTPBP8						RRAGC
						PDAP1			GUF1						RREB1
						PDCD6			GYG1						RRP36
						PDE3B			GYPB						RSL1D1
						PDE4DIP			GYPE						RSPH3
						PDE8A			HABP4						RTL8A
						PDLIM7			HACD2						RTL8C
						PDS5B			HACD3						RTN4IP1
						PDSS2			HACE1						SAGE1
						PDXDC1			HADH						SAMD15
						PEAK1			HAGHL						SAMM50
						PELI1			HAUS3						SAR1B
						PEPD			HAUS6						SCAMP2
						PEX10			HAUS7						SCARB1
						PEX14			HAX1						SCLY
						PEX2			HBP1						SCRN3
						PFAS			HCCS						SCYL1
						PFDN1			HCFC1						SDC4
						PFDN2			HCFC1R1						SDF2
						PFKP			HDDC2						SEC11A
						PGAP3			HDHD3						SEC22B
						PGBD1			HDLBP						SEC61G
						PGLYRP4			HEATR1						SEMA4C
						PGM3			HEATR5B						SEMA7A
						PGRMC1			HECA						SENP6
						PHC3			HELB						SERAC1
						PHETA2			HELLS						SERF2
						PHF2			HELQ						SERPINB6
						PHGDH			HELZ						SERPINH1
						PHKB			HERC4						SERTAD3
						PHKG2			HES6						SETD4
						PHTF2			HESX1						SETD7
						PIAS1			HEXB						SETMAR
						PIAS2			HFE						SFT2D1
						PIAS4			HHEX						SGF29
						PIGA			HIBCH						SGSH
						PIGBOS1			HIF1A						SH2B1
						PIGU			HIF1AN						SH3BP5L
						PIH1D1			HIGD1A						SHARPIN
						PIH1D2			HIGD2B						SHF
						PIK3R3			HILPDA						SIAH1
						PIK3R4			HINT2						SIKE1
						PIP4P2			HIST1H2BE						SIRT1
						PIP5K1C			HIST1H3I						SIRT7
						PITRM1			HIST3H3						SKIV2L
						PLAGL1			HJURP						SKP1
						PLAGL2			HK2						SLC15A4
						PLCB3			HLA-E						SLC1A5
						PLCG1			HLTF						SLC25A12
						PLK1			HM13						SLC25A13
						PLS1			HMBS						SLC25A17
						PMAIP1			HMG20A						SLC25A4
						PMPCA			HMG20B						SLC25A46
						PMPCB			HMGB1						SLC26A11
						PNKP			HMGB2						SLC29A1
						PNPLA2			HMGCS1						SLC2A1
						PNPO			HMGN2						SLC2A3
						POFUT1			HMGN5						SLC2A9
						POLD1			HMGXB3						SLC35A2
						POLDIP2			HMGXB4						SLC35F5
						POLE4			HNRNPA0						SLC35F6
						POLI			HNRNPC						SLC38A7
						POLK			HNRNPH1						SLC38A9
						POLR1A			HNRNPH3						SLC39A1
						POLR1E			HNRNPLL						SLC39A11
						POLR2E			HNRNPM						SLC39A3
						POLR2J2			HNRNPR						SLC5A6
						POLR2M			HNRNPUL2						SLC6A9
						POLR3GL			HOXC9						SLCO4A1
						POM121C			HPCA						SLFNL1
						POMP			HPCAL4						SLIRP
						PON2			HPGD						SMAD3
						POR			HPN						SMARCA4
						PPA2			HPRT1						SMARCB1
						PPARGC1B			HPS1						SMARCD2
						PPFIA1			HPS3						SMARCD3
						PPIF			HPS6						SMC5
						PPIH			HRASLS2						SMDT1
						PPIL2			HS3ST3B1						SMG8
						PPM1H			HSBP1						SMG9
						PPP1CC			HSD17B1						SMIM10L1
						PPP1R12A			HSD17B12						SMIM14
						PPP1R14C			HSD17B7						SMIM19
						PPP1R37			HSD17B8						SMIM20
						PPP1R8			HSD3B7						SMYD3
						PPP2CB			HSDL1						SNAP23
						PPP3CC			HSF1						SNAPC3
						PPP3R1			HSF4						SNRNP35
						PPP5C			HSP90B1						SNU13
						PREPL			HSPA14						SNX3
						PRICKLE3			HSPA14_r1						SNX33
						PRKAA1			HSPA1A						SNX6
						PRKAB1			HSPA4L						SOCS2
						PRKAG1			HSPA9						SOSTDC1
						PRKAR1B			HSPB1						SP100
						PRMT2			HSPBP1						SP3
						PRMT3			HSPH1						SP6
						PRMT5			HTATSF1						SPA17
						PRNP			HYI						SPAG4
						PROCR			HYKK						SPATA1
						PROSER2			HYOU1						SPATA33
						PRPF19			ICA1L						SPDYC
						PRPF3			ICE2						SPHK2
						PRPF31			IDH2						SPI1
						PRPSAP1			IFNAR2						SPIDR
						PRRC2B			IFRD2						SPIN3
						PRTFDC1			IFT46						SPOP
						PSMA2			IFT74						SPOPL
						PSMA3			IFT81						SPPL2B
						PSMA4			IFT88						SPRY1
						PSMA5			IGF1						SPRYD3
						PSMB7			IGLC1						SPRYD4
						PSMC1			IGLC7						SPTY2D1
						PSMC2			IGLV1-40						SREBF1
						PSMC3			IGLV2-11						SRP54
						PSMC4			IGLV2-18						SRR
						PSMD10			IGLV4-3						SSNA1
						PSMD11			IGLV7-46						ST3GAL4
						PSMD13			IGLV8-61						ST3GAL5
						PSMD2			IKZF1						ST7
						PSMD8			IL11RA						STAT1
						PSMG1			IL17RA						STAT5A
						PSMG2			IL17RC						STAU1
						PSORS1C2			IL6R						STEAP1B
						PSTPIP2			ILVBL						STK11IP
						PTAFR			IMMP2L						STK16
						PTCD3			IMPDH1						STK26
						PTDSS2			ING4						STK35
						PTEN			INIP						STMN1
						PTER			INO80D						STOML1
						PTGER3			INPP5B						STOML2
						PTGFRN			INTS10						STRN4
						PTGR2			INTS11						STX17
						PTP4A2			INTS12						STX18
						PTPN1			INTS2						SULT1A4
						PTPN18			INTS4						SUN1
						PTTG1			INTS6L						SUPT6H
						PUDP			INTS8						SUPT7L
						PUF60			INTU						SVBP
						PUS1			IP6K2						SWSAP1
						PWP2			IPO11						SYCE2
						PYCR2			IPO13						SYCP2L
						PYCR3			IPO7						SYNCRIP
						PYM1			IQSEC1						SYPL1
						RAB12			IRF2BP1						SZT2
						RAB2A			IRF7						TAF10
						RAB32			ISCA1						TAF11L10
						RAB43			ISOC2						TAF1A
						RAB5A			ITCH						TAF4B
						RAB7A			ITM2A						TAF5
						RAB9A			ITPR3						TAF6L
						RABEP1			ITPRID2						TAL1
						RABEPK			IVNS1ABP						TAPBP
						RABGGTB			IWS1						TARBP1
						RABIF			JAK1						TATDN1
						RABL2A			JMJD1C						TATDN2
						RACK1			JMJD4						TATDN3
						RAD23A			JPT2						TAX1BP3
						RAD23B			JRKL						TBC1D15
						RAD51B			JTB						TBC1D22A
						RAD9A			JUP						TBC1D4
						RADIL			KANK2						TBC1D5
						RALY			KANSL1L						TBX19
						RANBP10			KANSL2						TBXA2R
						RANBP2			KANSL3						TCAP
						RANBP6			KAT2A						TCEAL9
						RAVER1			KAT6B						TCTEX1D2
						RB1			KAT7						TDP2
						RBM12			KATNAL1						TECPR1
						RBM14-RBM4			KBTBD11-OT1						TEDC1
						RBM15B			KBTBD7						TEFM
						RBM22			KBTBD8						TESC
						RBM28			KCNJ6						TET2
						RBM34			KCNK5						TEX22
						RBM7			KCNK6						TEX54
						RBM8A			KCNQ5						TEX9
						RBPJ			KCTD21						TGFB1I1
						RBSN			KDELC1						TGM2
						RC3H2			KDELR1						TGOLN2
						RCC2			KDELR3						THADA
						RCE1			KDF1						THAP1
						RDX			KDM3B						THAP7
						REPIN1			KDM5B						THEGL
						RETSAT			KIAA1109						THOC1
						REXO5			KIAA1324						THTPA
						RFC4			KIAA1551						THUMPD3
						RFC5			KIAA1841						THY1
						RFWD3			KIDINS220						TIFA
						RFX1			KIF14						TIGD2
						RFXANK			KIF15						TIGD3
						RGS2			KIF1BP						TIGD6
						RHCE			KIF22						TIMELESS
						RHD			KIF23						TIMM10B
						RHNO1			KIF27						TIRAP
						RHOBTB3			KIF2A						TM9SF1
						RHOT2			KIF3B						TMCC2
						RINT1			KIF5B						TMCO1
						RLIM			KLC2						TMEM11
						RMND1			KLF1						TMEM120A
						RMND5A			KLF2						TMEM126A
						RMND5B			KLF3						TMEM147
						RNASE4			KLHDC1						TMEM158
						RNASEH1			KLHL11						TMEM165
						RNF114			KLHL12						TMEM168
						RNF125			KLHL23						TMEM175
						RNF19B			KLHL24						TMEM177
						RNF32			KLHL28						TMEM179B
						RNF4			KLHL8						TMEM18
						RNF40			KNOP1						TMEM181
						RNF6			KPNA1						TMEM184C
						RNF7			KPNA2						TMEM185B
						RPA1			KPNA6						TMEM191B
						RPAP1			KPNB1						TMEM217
						RPGR			KRCC1						TMEM253
						RPL10A			KRI1						TMEM267
						RPL11			KRR1						TMEM268
						RPL14			KRTCAP2						TMEM30A
						RPL17			KSR1						TMEM39A
						RPL18A			KTI12						TMEM50A
						RPL21			KXD1						TMEM53
						RPL23A			L3HYPDH						TMEM63A
						RPL31			L3MBTL2						TMEM64
						RPL32			LANCL1						TMEM68
						RPL35			LAPTM4B						TMEM72
						RPL36A			LAPTM5						TMF1
						RPL36A-HNRNPH2			LARGE2						TMOD1
						RPL37			LARP4						TMSB10
						RPL37A			LATS1						TNF
						RPL7A			LCLAT1						TNFRSF10A
						RPL9			LCOR						TNKS2
						RPLP1			LCP2						TOB1
						RPP25L			LDHB						TOPBP1
						RPRD1A			LDLR						TOPORS
						RPRD1B			LDLRAP1						TOR3A
						RPS15			LEKR1						TP53BP1
						RPS16			LENEP						TPBGL
						RPS17			LENG8						TPM4
						RPS19			LEPROT						TPRN
						RPS19BP1			LGR4						TRAF3IP2
						RPS21			LHFPL2						TRAPPC12
						RPS24			LIMK2						TRAPPC13
						RPS25			LINS1						TRAPPC2
						RPS27L			LIPT1						TRAPPC4
						RPS28			LIX1L						TRAPPC5
						RPS5			LLPH						TRBV20-1
						RPS6			LMAN1						TRBV5-6
						RPS6KB1			LMAN2						TRDJ2
						RPSA			LMAN2L						TREML2
						RRAGA			LMNA						TRGV8
						RRAS2			LMNTD2						TRIAP1
						RRN3			LMTK2						TRIM25
						RRP1			LONP2						TRIM38
						RRP15			LPCAT3						TRIM39
						RRP1B			LPGAT1						TRIM4
						RRP36			LRCH4						TRIM44
						RRP7A			LRR1						TRIM6-TRIM34
						RRP8			LRRC20						TRIM7
						RSBN1L			LRRC24						TRIP11
						RTF2			LRRC26						TRPA1
						RTL10			LRRC41						TRPC1
						RTN3			LRRC58						TSACC
						RTN4RL2			LRRC59						TSC22D1
						RTP3			LRRC73						TSG101
						RWDD2A			LRRC8A						TSNARE1
						S100A1			LRRC8B						TSPAN10
						S1PR2			LRRC8E						TSPAN3
						SAAL1			LRRCC1						TSPO
						SAGE1			LRRFIP1						TSPYL1
						SASS6			LSM10						TSPYL4
						SBNO1			LSM2						TSR3
						SBNO2			LSM4						TST
						SCAF4			LSM5						TTC14
						SCAP			LSM6						TTC21A
						SCFD1			LTBR						TTC26
						SCLY			LUC7L						TTC32
						SCML1			LUC7L3						TTI1
						SCO1			LUZP1						TTPAL
						SEC11A			LY6E						TUBB1
						SEC22B			LYPLA2						TUBB4B
						SEC24C			LYPLAL1						TUBGCP2
						SEC61A1			LYRM2						TUT1
						SEC62			LYRM9						TUT4
						SECISBP2			LZTS2						TWF1
						SEL1L3			MAD2L2						TWF2
						SELENBP1			MAGEA6						TXLNA
						SELPLG			MAGEB2						TXNDC15
						SENP5			MAGEF1						TXNDC17
						SENP7			MAGOH						TYK2
						SERBP1			MAGOHB						UBA3
						SERF1A			MAIP1						UBAC2
						SERF1B			MALSU1						UBB
						SET			MAMSTR						UBC
						SETD4			MAP1LC3B2						UBE2D4
						SETD9			MAP2K4						UBE2E1
						SETDB1			MAP3K1						UBE2H
						SETMAR			MAP3K20						UBE2J1
						SF3A2			MAP3K6						UBE2Q2L
						SF3B1			MAP4						UBE2V2
						SF3B6			MAP4K3						UBE2W
						SFT2D1			MAP4K4						UBE2Z
						SFT2D3			MAP4K5						UBL5
						SGF29			MAP7						UBR1
						SGSM3			MAPK12						UBXN7
						SH2D3A			MAPK14						ULK1
						SHARPIN			MAPK1IP1L						ULK3
						SHKBP1			MAPKAP1						UNC13B
						SIAE			MAPKBP1						UNC50
						SIDT2			MAPRE1						URGCP
						SIGMAR1			MARK2						URI1
						SIKE1			MARVELD1						USF1
						SIRT3			MAT2B						USP1
						SIRT4			MATR3_r1						USP11
						SIRT7			MBIP						USP16
						SKA1			MBNL2						USP25
						SKIDA1			MBOAT7						USP47
						SLC12A7			MBTPS2						USP48
						SLC15A4			MCCC1						USP5
						SLC16A5			MCCC2						USP8
						SLC17A5			MCL1						VAMP8
						SLC18B1			MCM3						VCP
						SLC19A2			MCM7						VDAC1
						SLC1A5			MCM9						VDAC3
						SLC25A12			MCOLN1						VMP1
						SLC25A33			MCTS1						VPS25
						SLC25A38			MCTS2P						VPS33B
						SLC25A45			MDH1						VPS37A
						SLC2A8			MDM4						VPS37D
						SLC35A2			MDP1						VWA1
						SLC35A5			MED10						VWA7
						SLC35B2			MED15						WASHC2C
						SLC35C2			MED23						WASHC5
						SLC37A3			MED27						WDR27
						SLC38A10			MED28						WDR36
						SLC39A14			MED31						WDR53
						SLC45A4			MED4						WDR54
						SLC48A1			MED7						WDR7
						SLC4A1AP			MED9						WDR82
						SLC6A6			MEGF8						WDR89
						SLC8B1			MELK						WFDC3
						SLC9B2			MELTF						WIPI2
						SLIRP			MEN1						WRB
						SLMAP			MEST						WRB-SH3BGR
						SLX1B			METAP1						WSB2
						SMAD5			METTL14						WSCD2
						SMAP1			METTL15						XPC
						SMARCA5			METTL16						XRCC5
						SMARCD2			METTL17						XRN2
						SMARCE1			METTL27						XRRA1
						SMCO4			METTL3						YAE1
						SMDT1			METTL5						YBEY
						SMG8			METTL6						YIPF2
						SMG9			METTL7A						YIPF3
						SMIM10			METTL7B						YIPF6
						SMIM14			MFN2						YWHAZ
						SMIM26			MGST1						YY1AP1
						SMIM27			MIA3						ZBTB14
						SMIM4			MIB2						ZBTB25
						SMIM8			MICU2						ZBTB4
						SMN2			MID1IP1						ZC2HC1C
						SMNDC1			MIEF1						ZC3H14
						SNAP23			MIEN1						ZC3H15
						SNCG			MIER1						ZCCHC3
						SNRK			MINDY4						ZCCHC9
						SNRNP35			MINOS1-NBL1						ZCRB1
						SNRPA1			MIOS						ZDHHC13
						SNRPB			MIPOL1						ZDHHC17
						SNRPC			MIS18A						ZDHHC3
						SNRPD3			MKI67						ZDHHC7
						SNRPE			MKNK1						ZER1
						SNW1			MKRN3						ZFAND2B
						SNX12			MKS1						ZFP1
						SNX18			MLF1						ZFP36
						SNX3			MMAB						ZFP64
						SNX5			MMADHC						ZGPAT
						SNX6			MMS19						ZKSCAN3
						SOCS6			MMS22L						ZKSCAN5
						SOD2			MNAT1						ZMIZ1
						SOS1			MND1						ZNF106
						SOSTDC1			MNS1						ZNF148
						SPA17			MNT						ZNF184
						SPC24			MOB3A						ZNF2
						SPCS2			MOK						ZNF200
						SPECC1L			MON1B						ZNF22
						SPG11			MORC3						ZNF230
						SPIDR			MORF4L2						ZNF248
						SPINK4			MORN1						ZNF257
						SPOCD1			MORN4						ZNF274
						SPOPL			MPHOSPH10						ZNF296
						SPPL2A			MPHOSPH6						ZNF316
						SPPL2B			MPLKIP						ZNF333
						SPSB3			MPP5						ZNF33A
						SPTA1			MPPE1						ZNF33B
						SPTY2D1			MRE11						ZNF391
						SRRM1			MRFAP1L1						ZNF395
						SRSF6			MRPL1						ZNF436
						SSBP1			MRPL10						ZNF507
						SSBP3			MRPL12						ZNF517
						SSH2			MRPL15						ZNF518B
						SSMEM1			MRPL16						ZNF557
						SSU72			MRPL17						ZNF558
						ST3GAL3			MRPL19						ZNF561
						ST6GALNAC6			MRPL2						ZNF562
						STAG2			MRPL21						ZNF571
						STAT1			MRPL23						ZNF583
						STAU2			MRPL24						ZNF598
						STEAP1B			MRPL28						ZNF607
						STK11IP			MRPL3						ZNF619
						STK25			MRPL32						ZNF626
						STK35			MRPL37						ZNF66
						STK38			MRPL39						ZNF668
						STOML1			MRPL44						ZNF672
						STRADA			MRPL46						ZNF681
						STX18			MRPL47						ZNF684
						STX1A			MRPL49						ZNF688
						STX5			MRPL50						ZNF69
						STXBP2			MRPL52						ZNF692
						STXBP3			MRPL53						ZNF696
						STYK1			MRPL58						ZNF710
						SUCLG1			MRPS16						ZNF713
						SUCLG2			MRPS17						ZNF721
						SUDS3			MRPS18A						ZNF747
						SUGP1			MRPS21						ZNF75A
						SUMF1			MRPS24						ZNF770
						SUPT20H			MRPS31						ZNF771
						SUPT7L			MRPS33						ZNF777
						SURF4			MRPS35						ZNF778
						SYBU			MRPS9						ZNF784
						SYCE2			MRTFB						ZNF813
						SYDE2			MRTO4						ZNF837
						TAB1			MSANTD4						ZNF843
						TACO1			MSH2						ZNF878
						TADA1			MSH5						ZNHIT1
						TADA2A			MSH6						ZP3
						TAF11			MSMO1						ZSCAN22
						TAF12			MSRA						ZSCAN26
						TAF3			MSRB1						ZSCAN30
						TAF5			MSRB2						ZSWIM6
						TAF6			MTCH2						ZWILCH
						TAF7			MTERF2
						TAF8			MTFP1
						TAMM41			MTFR1
						TANGO6			MTFR2
						TARDBP			MTG2
						TATDN1			MTHFR
						TATDN2			MTHFS
						TATDN3			MTIF2
						TAX1BP3			MTIF3
						TBC1D13			MTMR14
						TBC1D14			MTR
						TBC1D15			MTREX
						TBC1D19			MTRF1
						TBC1D22A			MTRF1L
						TBL1X			MTRNR2L1
						TBL2			MTRNR2L12
						TBRG1			MTRNR2L7
						TCAF2C			MTX1
						TCF12			MUC20
						TCHP			MYBBP1A
						TCP1			MYCBP
						TCTE1			MYD88
						TDP1			MYDGF
						TDRD7			MYH7B
						TEFM			MYH9
						TENT5C			MYO18B
						TERF2			MYO1C
						TERF2IP			MYSM1
						TEX10			MZF1
						TEX38			N4BP2
						TEX54			N4BP2L2
						THAP7			NAA20
						THEGL			NAAA
						THEMIS2			NAE1
						THOC1			NAF1
						THRA			NAGS
						THUMPD2			NANS
						THUMPD3			NAP1L1
						TICAM1			NAPB
						TIGD6			NAPG
						TIMM13			NAPRT
						TIMM17A			NAPSA
						TIMM17B			NASP
						TIMM8B			NAT14
						TIPARP			NAXD
						TIPIN			NBEAL2
						TJAP1			NBL1
						TK1			NBPF26
						TKFC			NBPF9
						TMCC2			NCAPG2
						TMCO1			NCBP2
						TMEM107			NCEH1
						TMEM120A			NCK1
						TMEM126B			NCKAP1
						TMEM128			NCOA2
						TMEM144			NCOA5
						TMEM147			NCOR1
						TMEM14B			NCR1
						TMEM156			NDEL1
						TMEM168			NDFIP2
						TMEM179B			NDRG2
						TMEM18			NDUFA1
						TMEM19			NDUFA11
						TMEM192			NDUFA12
						TMEM230			NDUFA4
						TMEM242			NDUFA5
						TMEM258			NDUFA6
						TMEM260			NDUFAB1
						TMEM268			NDUFAF4
						TMEM30A			NDUFAF5
						TMEM38B			NDUFAF6
						TMEM39A			NDUFAF8
						TMEM41A			NDUFB10
						TMEM50A			NDUFB2
						TMEM51			NDUFB3
						TMEM87B			NDUFB4
						TNFRSF1A			NDUFC1
						TNFRSF21			NDUFS4
						TNFRSF8			NDUFS8
						TNKS2			NDUFV2
						TNNT1			NDUFV3
						TNPO2			NECAP1
						TOB2			NECAP2
						TOMM20			NEDD4
						TOMM22			NEIL3
						TOMM34			NEK1
						TOMM6			NEK4
						TONSL			NELFB
						TOP3B			NELFCD
						TOR1A			NEMF
						TOR1AIP1			NEMP1
						TP53BP1			NETO2
						TP53TG5			NF1
						TPGS1			NF2
						TPP2			NFATC1
						TPRG1L			NFE2L3
						TPRN			NFIA
						TRA2B			NFIC
						TRAP1			NFKBIA
						TRAPPC4			NFKBIB
						TRGV8			NFKBID
						TRIB1			NFXL1
						TRIM11			NGB
						TRIM25			NGLY1
						TRIM27			NHP2
						TRIM44			NIPSNAP1
						TRIM66			NIPSNAP2
						TRIP13			NISCH
						TRIP6			NKAP
						TRIR			NKAPD1
						TRMT2A			NKRF
						TRPC1			NKTR
						TRPM4			NKX3-2
						TRPS1			NLE1
						TRUB1			NLN
						TRUB2			NLRP10
						TSC1			NME1
						TSC22D4			NME1-NME2
						TSFM			NME3
						TSPAN10			NMI
						TSPAN3			NMNAT3
						TSR3			NMRK1
						TSTD3			NMT2
						TTC17			NMU
						TTC26			NOC3L
						TTC28			NOC4L
						TTC30B			NOD1
						TTC31			NOL12
						TTC32			NOL3
						TTC33			NOL7
						TTC4			NOL9
						TTC9B			NOLC1
						TTI1			NOM1
						TTK			NOMO1
						TTLL4			NONO
						TUBB2A			NOP14
						TWNK			NOP2
						TXNDC15			NOP53
						TXNRD2			NOP9
						U2SURP			NOTUM
						UAP1			NPHP3
						UBA1			NPHP4
						UBA3			NPLOC4
						UBAC1			NQO2
						UBAC2			NR1D1
						UBE2B			NR2C2AP
						UBE2E1			NR2F2
						UBE2J1			NRAS
						UBE2V1			NRBP2
						UBE2W			NRDE2
						UBE3B			NRGN
						UBE4A			NRM
						UBE4B			NRSN2
						UBIAD1			NSL1
						UBL5			NSMAF
						UBR3			NSMCE3
						UBXN1			NSMCE4A
						UBXN4			NSUN2
						UBXN7			NSUN3
						UHMK1			NSUN5
						UHRF1BP1L			NT5C2
						UHRF2			NT5DC1
						ULBP2			NUB1
						ULK1			NUBP2
						UNC119			NUBPL
						UNC13D			NUCB1
						UNC50			NUCKS1
						UNC79			NUDC
						UPF1			NUDT12
						UPF2			NUDT16L1
						UPF3A			NUDT17
						UQCC1			NUDT19
						UQCC2			NUDT22
						UQCRC1			NUDT3
						UQCRC2			NUDT7
						UQCRFS1			NUFIP1
						URI1			NUMA1
						USE1			NUP107
						USF2			NUP133
						USHBP1			NUP205
						USP10			NUP37
						USP16			NUP58
						USP21			NUP62CL
						USP47			NUP98
						UTP11			NUPL2
						UTP4			NUTF2
						VAC14			NXT2
						VAMP2			OAZ2
						VAMP8			OCIAD1
						VAPB			OFD1
						VBP1			OGA
						VCL			OGFOD3
						VDAC2			OGFR
						VGF			OGT
						VIM			OMA1
						VOPP1			OPA1
						VPS13B			OR2AE1
						VPS25			OR2C1
						VPS28			OR4F16
						VPS33A			OR4F29
						VPS39			OR4F4
						VPS4A			OR52D1
						VPS72			ORAI2
						VPS9D1			ORAI3
						VWA7			ORC1
						VWA8			ORC4
						WAPL			ORMDL1
						WASHC2A			OS9
						WASHC2C			OSBPL2
						WASHC5			OSBPL5
						WBP1L			OSGIN2
						WBP2			OSTC
						WDR13			OTUD3
						WDR24			OVCA2
						WDR25			OXCT1
						WDR26			OXNAD1
						WDR33			P2RY11
						WDR47			PABPC1L
						WDR48			PACS1
						WDR53			PALB2
						WDR82			PALM3
						WFDC3			PANK2
						WRAP73			PANX1
						WSCD2			PARL
						XPO1			PARP16
						XRCC2			PBDC1
						XRN1			PBX2
						XRRA1			PCBD1
						XYLB			PCBD2
						YEATS4			PCDH1
						YIPF6			PCED1A
						YJEFN3			PCF11
						YPEL3			PCGF1
						YTHDF2			PCGF3
						YWHAG			PCGF6
						ZBTB1			PCID2
						ZBTB11			PCIF1
						ZBTB25			PCM1
						ZBTB4			PCMT1
						ZBTB43			PCMTD2
						ZBTB45			PCNA
						ZBTB9			PCNX4
						ZC2HC1C			PCOLCE
						ZC3H12A			PCOLCE2
						ZC3H15			PCSK7
						ZC3H18			PDCD11
						ZC3HC1			PDCD2
						ZCCHC3			PDCD2L
						ZCCHC9			PDCD4
						ZCWPW1			PDCD5
						ZDHHC14			PDCD6IP
						ZDHHC17			PDCL
						ZDHHC18			PDE11A
						ZDHHC6			PDE12
						ZDHHC7			PDE3B
						ZFAND6			PDE6D
						ZFC3H1			PDF
						ZFR			PDHB
						ZFYVE19			PDIA3
						ZFYVE9			PDIA5
						ZKSCAN1			PDLIM1
						ZKSCAN4			PDLIM5
						ZKSCAN8			PDP2
						ZMAT2			PDPR
						ZMIZ2			PEAK1
						ZNF121			PELI1
						ZNF14			PES1
						ZNF142			PEX11G
						ZNF148			PEX12
						ZNF165			PEX14
						ZNF195			PEX16
						ZNF197			PEX26
						ZNF2			PFAS
						ZNF205			PFDN4
						ZNF207			PFDN6
						ZNF212			PFKM
						ZNF24			PFN4
						ZNF251			PGAM1
						ZNF286A			PGD
						ZNF33B			PGK2
						ZNF347			PGLS
						ZNF354B			PGLYRP4
						ZNF384			PGM2
						ZNF408			PGRMC1
						ZNF420			PHAX
						ZNF425			PHF14
						ZNF429			PHF3
						ZNF433			PHF7
						ZNF451			PHLDA1
						ZNF468			PHOSPHO2
						ZNF485			PHTF2
						ZNF486			PHYH
						ZNF490			PHYKPL
						ZNF493			PI4K2A
						ZNF501			PI4K2B
						ZNF512			PI4KB
						ZNF519			PIAS1
						ZNF557			PIAS3
						ZNF569			PIAS4
						ZNF572			PIGA
						ZNF586			PIGC
						ZNF598			PIGK
						ZNF611			PIGL
						ZNF621			PIGM
						ZNF622			PIGP
						ZNF646			PIGU
						ZNF674			PIGV
						ZNF688			PIGZ
						ZNF692			PIK3IP1
						ZNF696			PIK3R4
						ZNF720			PIN1
						ZNF721			PINX1
						ZNF746			PINX1_r1
						ZNF770			PIP4K2B
						ZNF777			PIP5K1A
						ZNF786			PIP5K1C
						ZNF791			PIR
						ZNF808			PITPNM1
						ZNF813			PITRM1
						ZNF852			PKIG
						ZNHIT2			PKN2
						ZSCAN26			PKN3
						ZSCAN30			PLA2G2C
						ZSCAN9			PLCG1
						ZSWIM8			PLD6
						ZW10			PLEKHA3
						ZWILCH			PLEKHA4
						ZXDC			PLEKHA5
									PLEKHA8
									PLEKHB2
									PLEKHF2
									PLEKHM3
									PLEKHN1
									PLIN5
									PLK1
									PLK4
									PLP2
									PLPP6
									PLRG1
									PLSCR1
									PLTP
									PLXNA3
									PMF1
									PML
									PMPCA
									PMPCB
									PMVK
									PNISR
									PNKP
									PNN
									PNP
									PNPO
									PNPT1
									POC1B
									POC1B-GALNT4
									POC5
									POLA1
									POLB
									POLD1
									POLD2
									POLE
									POLG2
									POLI
									POLN
									POLQ
									POLR1C
									POLR2C
									POLR2E
									POLR2G
									POLR2I
									POLR2J
									POLR2J2
									POLR2J3
									POLR2J3_r1
									POLR2M
									POLR3C
									POLR3F
									POLR3K
									POLRMT
									POM121C
									POMGNT2
									POMK
									POMT1
									POP5
									POP7
									POPDC3
									PPA2
									PPAN
									PPAN-P2RY11
									PPAT
									PPDPF
									PPIB
									PPIF
									PPIH
									PPIL1
									PPM1B
									PPM1F
									PPME1
									PPOX
									PPP1CB
									PPP1R12B
									PPP1R14C
									PPP1R15B
									PPP1R18
									PPP1R26
									PPP1R3C
									PPP1R8
									PPP2CA
									PPP2CB
									PPP2R2D
									PPP2R5C
									PPP4R2
									PPP6C
									PPRC1
									PPWD1
									PRAME
									PRCC
									PRCP
									PRDM10
									PRDM11
									PRDM4
									PRDX4
									PRDX6
									PREB
									PRELID1
									PRELID3A
									PREP
									PREPL
									PRF1
									PRIM1
									PRIM2
									PRKAA1
									PRKAB1
									PRKAR2A
									PRKCI
									PRKN
									PRKRIP1
									PRKX
									PRMT1
									PRMT6
									PROS1
									PROSER1
									PROSER2
									PRPF18
									PRPF19
									PRPF38B
									PRPF40A
									PRPF4B
									PRPF6
									PRPS1
									PRPS2
									PRPSAP1
									PRPSAP2
									PRR13
									PRR14L
									PRR3
									PRR7
									PRRC1
									PRRC2C
									PRSS16
									PRX
									PSAT1
									PSD4
									PSIP1
									PSMA1
									PSMA6
									PSMB1
									PSMB10
									PSMB2
									PSMB4
									PSMB5
									PSMC1
									PSMC5
									PSMD10
									PSMD11
									PSMD12
									PSMD14
									PSMD3
									PSMD4
									PSMD7
									PSMD9
									PSTPIP2
									PTAR1
									PTBP2
									PTBP3
									PTCD2
									PTCH2
									PTER
									PTGES2
									PTGR2
									PTK2B
									PTPN1
									PTPN2
									PTPN9
									PTPRC
									PTTG1
									PUDP
									PUM1
									PUS1
									PUS10
									PUS7
									PVR
									PWP2
									PWWP2A
									PXMP4
									PXN
									PXT1
									PYCR1
									PYGB
									PYGL
									PYGO2
									R3HCC1
									RAB10
									RAB11FIP1
									RAB14
									RAB18
									RAB23
[truncated: 1,056 more rows]
